# 1 Structure of *Escherichia coli* respiratory complex I 2 reconstituted into lipid nanodiscs reveals an 3 uncoupled conformation

4  
5 Piotr Kolata\*<sup>§</sup>, and Rouslan G. Efremov\*<sup>§1</sup>

6 \* Center for Structural Biology, Vlaams Instituut voor Biotechnologie, Brussels, Belgium

7 <sup>§</sup> Structural Biology Brussels, Department of Bioengineering Sciences, Vrije Universiteit  
8 Brussel, Brussels, Belgium

9 <sup>1</sup> Corresponding author.

10 E-mail address: rouslan.efremov@vub.vib.be

## 11 Abstract

12 Respiratory complex I is a multi-subunit membrane protein complex that reversibly couples  
13 NADH oxidation and ubiquinone reduction with proton translocation against trans-membrane  
14 potential. Complex I from *Escherichia coli* is among the best functionally characterized  
15 complexes, but its structure remains unknown, hindering further mechanistic studies to  
16 understand the enzyme coupling mechanism. Here we describe the single particle cryo-  
17 electron microscopy (cryo-EM) structure of the entire catalytically active *E. coli* complex I  
18 reconstituted into lipid nanodiscs. The structure of this mesophilic bacterial complex I  
19 displays highly dynamic connection between the peripheral and membrane domains. The  
20 peripheral domain assembly is stabilized by unique terminal extensions and an insertion loop.  
21 The membrane domain structure reveals novel dynamic features. Unusual conformation of the  
22 conserved interface between the cytoplasmic and membrane domains suggests an uncoupled  
23 conformation of the complex. Based on these structural data we suggest a new simple and  
24 testable coupling mechanism for the molecular machine.

25

## 26 Introduction

27 Complex I, NADH:ubiquinone oxidoreductase, is a multi-subunit enzyme found in many  
28 bacteria and most eukaryotes. It facilitates transfer of two electrons from NADH to  
29 ubiquinone, or its analogues, coupled reversibly with translocation of four protons across the  
30 membrane against trans-membrane potential (Galkin et al., 2006; Sazanov, 2015). Structures  
31 of the complete complex I from several eukaryotes (Fiedorczuk et al., 2016; Hunte et al.,  
32 2010; Kampjut and Sazanov, 2020; Zhu et al., 2016), one thermophilic bacterium (Baradaran  
33 et al., 2013), and the partial structure of the membrane domain of *Escherichia coli* complex I  
34 (Efremov and Sazanov, 2011), have been determined.

35 The composition of complex I differs significantly between species. Mitochondrial complex I  
36 has molecular weight 1 MDa and comprises more than 35 subunits (Wirth et al., 2016)  
37 whereas bacterial analogues are much smaller with molecular weights approximately 500  
38 kDa. Complex I from all characterized species contains homologues of 14 core subunits;  
39 seven subunits each assemble into peripheral and membrane arms, joined at their tips and  
40 form the complex with a characteristic L-shape.

41 The peripheral arm, exposed to the cytoplasm in bacteria or the mitochondrial matrix in  
42 eukaryotes, contains binding sites for NADH, ubiquinone, and flavin mononucleotide (FMN)  
43 as well as eight or nine iron-sulfur clusters, seven of which connect the NADH and  
44 ubiquinone-binding sites (Sazanov, 2015) enabling rapid electron transfer (Verkhovskaya et  
45 al., 2008) .

46 The membrane-embedded arm includes a chain of three antiporter-like subunits, NuoL,  
47 NuoM, and NuoN (*E. coli* nomenclature is used for the subunits hereafter) (Efremov and  
48 Sazanov, 2011), which are also found in the Mrp family of multisubunit H<sup>+</sup>/Na antiporters  
49 (Steiner and Sazanov, 2020). Each antiporter-like subunit contains two structural repeats  
50 comprising five trans-membrane helices (TMH, TMH4-8, and TMH9-13). TMH7 and

51 TMH12 are interrupted by an extended loop in the middle of the membrane and the helix  
52 TM8 at the interface between symmetric motifs is interrupted by the  $\pi$ -bulge (Baradaran et  
53 al., 2013; Efremov and Sazanov, 2011). Membrane-embedded NuoH mediates interaction  
54 with the peripheral arm and also contains five-helix structural repeats found in antiporter-like  
55 subunits (Baradaran et al., 2013). Together with subunits NuoB and NuoD it forms an  
56 extended ubiquinone-binding cavity (Q-cavity) spanning the membrane bilayer hydrophobic  
57 region to the ubiquinone-binding site (Q-site) in the proximity of the terminal iron-sulfur  
58 cluster N2 (Baradaran et al., 2013).

59 The membrane arm features a continuous chain of conserved and functionally important  
60 ionizable residues positioned in the middle of the membrane. These are suggested to be  
61 involved in proton translocation and its coupling to electron transfer (Baradaran et al., 2013;  
62 Efremov and Sazanov, 2011). Attempts to visualize conformational changes in the membrane  
63 domain (Kampjut and Sazanov, 2020; Parey et al., 2018) have revealed rotation of the  
64 cytoplasmic half of TMH3 of NuoJ in mammalian complex I (Agip et al., 2018) and were  
65 associated with active-deactive transition. Recently, proton translocation mechanisms without  
66 conformational changes in antiporter-like subunits were suggested (Kampjut and Sazanov,  
67 2020; Steiner and Sazanov, 2020). However, all proposed coupling mechanisms remain  
68 largely speculative and require further validation by functional, biochemical, and structural  
69 methods.

70 *E. coli* complex I is among the best functionally characterized complex I. It has been studied  
71 using many biophysical and biochemical techniques (Verkhovskaya and Bloch, 2012).  
72 Combined with the possibility of fast and extensive mutagenesis (Pohl et al., 2007;  
73 Verkhovskaya and Bloch, 2012), it represents a highly attractive system to study the coupling  
74 mechanism. However, owing to its fragile and dynamic nature (Verkhovskaya and Bloch,

75 2012), high-resolution structures of this complex remain limited to a partial structure of the  
76 membrane domain (Efremov and Sazanov, 2011).  
77 Here we present a single particle cryo-EM structure of the entire *E. coli* complex I  
78 reconstituted into lipid nanodiscs, with the peripheral arm structure solved at 2.1 Å resolution  
79 and that of the membrane domain at 3.7 Å.

## 80 Results

### 81 Overall structure

82  
83 Twin-strep tag was added to genomically encoded subunit NuoF using a CRISPR-Cas9 based  
84 system (Jiang et al., 2015) (Figure 1 - figure supplement 1). This enabled single-step  
85 purification of solubilized complex (Figure 1 - figure supplement 2A), which was further  
86 reconstituted into lipid nanodiscs comprising *E. coli* polar lipids and membrane scaffold  
87 protein MSP2N2 (Grinkova et al., 2010) (Figure 1 - figure supplement 2A,B). Mass  
88 photometry indicated that reconstituted complex I was homogeneous and monodispersed  
89 (Figure 1 - figure supplement 2C,D).

90 NADH:potassium ferricyanide (FeCy) and NADH:ubiquinone-1 (Q1) activities of the  
91 reconstituted complex I (Figure 1 - figure supplement 2E,F) were similar to those of  
92 detergent-purified protein supplemented with native *E. coli* lipids (Sazanov, 2003).

93 Furthermore, NADH:Q1 activity was completely inhibited by piericidin-A (Figure 1 - figure  
94 supplement 2F) indicating that complex I reconstituted in lipid nanodiscs was intact and  
95 catalytically active in a detergent-free environment.

96 We determined the single particle cryo-EM structure of the reconstituted complex (Figure 1,  
97 Figure 1 - figure supplement 3,4, Table 1, Movie 1). Multiple conformations of the complex  
98 that differed by relative positions of the peripheral and membrane arms were revealed by 3D  
99 classification (Figure 1 - figure supplement 4,5). Three conformations of the entire complex  
100 were reconstructed to average resolutions between 3.3 and 3.7 Å (Figure 1 - figure

101 [supplement 4](#)) resolving the interface between the arms; however, due to high-residual  
102 mobility of the arms, the antiporter-like subunits were resolved at below 8 Å ([Figure 1 -](#)  
103 [figure supplement 4](#)).

104 Focused refinement of each arm separately and subtraction of nanodisc density ([Figure 1 -](#)  
105 [figure supplement 3](#)) improved the resolution of peripheral and membrane arms to 2.7 Å and  
106 3.7 Å, respectively ([Figure 1 - figure supplement 3,4, Table 1](#)).

107 Micrograph analysis, in contrast to mass photometry, revealed that large fraction of the  
108 particles corresponds to the peripheral arm only ([Figure 1 - figure supplement 3](#)) that may  
109 have dissociated during cryo-EM sample preparation. These yielded 3D reconstruction to 2.8  
110 Å resolution ([Figure 1 - figure supplement 3](#)), similar to the map of the peripheral arm of  
111 intact complex I. Joining two subsets improved resolution of the peripheral arm to 2.1 Å  
112 ([Table 1, Figure 1 - figure supplement 4](#)). Using the resulting maps, an atomic model of the  
113 entire *E. coli* complex I was built, comprising 4618 residues and accounting for 94.7% of the  
114 total polypeptide constituting the complex ([Table 2](#)).

115 Arrangement of the arms and individual core subunits in *E. coli* complex I is very similar to  
116 that of *Thermus thermophilus* (RMSD 6.3 Å over 2593 Cα atoms, 4.0 Å membrane arm over  
117 1604 atoms, and 2.2 Å for peripheral arm 855 Cα) and mammalian enzyme (8.3 Å over 2420  
118 Cα atoms (3.8 Å MD 1710 atoms, PD 2.0 767 Cα)) ([Figure 1B](#)) apart from the relative long-  
119 range twisting and bending of arms observed between complex I from different species  
120 ([Baradaran et al., 2013; Vinothkumar et al., 2014](#)).

121 Comparison of *E. coli* complex I conformations reconstructed to better than 4 Å resolution  
122 revealed two modes of relative arm rotation ([Figure 1C](#)): 1) rotation around an axis that  
123 passes through the NuoH-NuoB interface and is tilted around 45 degrees out of the plane  
124 formed by the arms with an amplitude of at least 13 degrees, and 2) rotation around an axis  
125 parallel to the membrane and roughly perpendicular to the long axis of the membrane arm

126 with an amplitude of approximately 4 degrees. Although relative arm movements were  
127 observed in mammalian (Kampjut and Sazanov, 2020; Zhu et al., 2016) and *T. thermophilus*  
128 complex I (Gutiérrez-Fernández et al., 2020), their amplitudes were smaller and movement  
129 directionality was less diverse. Despite significant relative arm movements, the structure of  
130 each arm was rigid and did not reveal different conformations apart from the specific local  
131 dynamics discussed below.

### 132 Structure of the peripheral arm

133 Architecture of the peripheral arm reveals a novel evolutionary strategy to stabilize the  
134 subcomplex

135 At an average resolution of 2.1 Å with the local resolution in the core reaching 2.0 Å (Figure  
136 1 - figure supplement 4) conformations of most side chains in the peripheral arm, positions of  
137 ions, and multiple water molecules were resolved unambiguously (Figure 2, Figure 1 - figure  
138 supplement 6).

139 The overall architecture of the conserved core of the peripheral arm subunits is very similar to  
140 other homologues. Unlike other structurally characterized homologues, *E. coli* subunits NuoC  
141 and NuoD are joined in a single polypeptide. The 35 amino acid-long linker includes an  $\alpha$ -  
142 helix (residues 180-194) that interacts with subunit NuoB (Figure 2A). The relative positions  
143 of all redox centers with FMN and nine iron-sulfur clusters, including off path cluster N7  
144 (Sazanov, 2006), are particularly well conserved (Figure 2C).

145 A distinctive feature of the *E. coli* peripheral arm is the presence of ordered C-terminal  
146 extensions in subunits NuoB, NuoI, and NuoF with a length of 22 to 45 residues and a large  
147 94 residue insertion loop in subunit NuoG, referred to as the G-loop (Figure 2A, Table 3).

148 These extensions are unique among structurally characterized complex I homologues and  
149 have a well-defined structure. While the G-loop has a compact fold, the conformation of the  
150 C-terminal tails is extended. They line the surface of the conserved fold of the peripheral arm

151 with high shape complementarity (Figure 2A, Figure 2 - figure supplement 1). Apart from a  
152 few helical turns, these extensions have no secondary structure elements (Table 3). They  
153 create additional inter-subunit contacts with some surface areas exceeding 1,000 Å<sup>2</sup> and  
154 involving polar interactions (Table 3). Similarly, the G-loop fills a crevice between NuoCD,  
155 NuoI, and NuoG subunits (Figure 2A). Together the extensions and G-loop increase the  
156 interaction surface between the electron acceptor module (NuoEFG) and connecting module  
157 (NuoICDB) by a factor of three (from 1400 to 4600 Å<sup>2</sup>), thus stabilizing the peripheral arm  
158 assembly. These structural features are conserved within the Enterobacteriaceae family and  
159 are very common in the phylum Gammaproteobacteria. They display high conservation of  
160 interfacial residues, particularly for the G-loop (Figure 2 - figure supplement 1) and  
161 demonstrate a new evolutionary strategy for complex stabilization that was not observed to  
162 date in complex I structures from other species.

163 A strong density near the NuoG surface coordinated by <sup>G</sup>Asp617, <sup>G</sup>Gln632, <sup>G</sup>Glu647,  
164 <sup>G</sup>Asp731 and four water molecules (Figure 2B) was assigned to a Ca<sup>2+</sup> ion. The coordination  
165 number, geometry, and ion-ligand distances of ca 2.5 Å (H. Zheng et al., 2008) as well as the  
166 2 mM concentration of Ca<sup>2+</sup> in the buffer support this assignment. Divalent ions are known to  
167 increase both the activity and stability of *E. coli* complex I (Sazanov, 2003). One of the  
168 calcium ligands, <sup>G</sup>Asp731, is part of the G-loop, suggesting that Ca<sup>2+</sup> stabilizes the fold of the  
169 G-loop and consequently, the peripheral arm.

170 The extensions spatially overlap with the supernumerary subunits of complex I from *T.*  
171 *thermophilus* (Sazanov, 2006) and the structurally conserved supernumerary subunits of  
172 eukaryotic complex I (Zhu et al., 2016) (Table 3), consistent with the suggestion that the  
173 primary role of supernumerary subunits is to stabilize the complex (Fiedorczuk et al., 2016).

174 Bound water molecules

175 At 2.1 Å resolution, 1165 water molecules associated with the peripheral arm were modelled  
176 (Figure 2D). The positions of 180 water molecules are conserved with those identified in the  
177 peripheral arm of ovine complex I (Kampjut and Sazanov, 2020) (Figure 2D, red spheres).  
178 Most of conserved waters are buried in the interior of the subunits, shielded from the solvent,  
179 and most likely play a structural role in maintaining the subunit fold. Only a few water  
180 molecules interact closely with iron-sulfur clusters and may influence their potential (Table 4,  
181 Figure 1 - figure supplement 5). The water molecules located close to or between iron-sulfur  
182 clusters are not more conserved than those in the other parts of the complex, suggesting that  
183 they were not evolutionary selected to optimize the rate of electron transfer as was suggested  
184 by Schulte et.al. (Schulte et al., 2019a).

185 At 2.1 Å resolution, several unusual density features were observed next to some surface-  
186 exposed histidines and between some cysteine-methionine pairs as listed in Table 6 and  
187 depicted in Figure 3 - figure supplement 1.

188 Electron input and output sites

189 The FMN conformation and key water molecules in the NADH-binding pocket of *E. coli*  
190 complex I are conserved (Kampjut and Sazanov, 2020; Schulte et al., 2019b). This includes  
191 the position of W1060 that forms a hydrogen bond with the isoalloxazine ring N5 atom in  
192 FMN and with <sup>F</sup>Glu92, which likely acts as the activating group during catalysis of hydride  
193 transfer from NADH (Fraaije et al., 2000) (Figure 3A). Schulte et.al. (Schulte et al., 2019b)  
194 suggested a mechanism for regulation of reactive oxygen species (ROS) generation by *E. coli*  
195 complex I that involves flipping the carbonyl oxygen of <sup>F</sup>Glu93 upon enzymatic reduction.  
196 Our structure unambiguously places the corresponding carbonyl oxygen in a conformation  
197 that points away from FMN (Figure 3A) similar to conformations found in the reduced and



198 oxidized ovine complex I (Kampjut and Sazanov, 2020), which does not support its  
199 involvement in ROS regulation.  
200 *E. coli*-specific features in the FMN-binding pocket include <sup>F</sup>His400 that replaces the Leu  
201 residues found in other homologues. <sup>F</sup>His400 is in Van der Waals contact with the  
202 isoalloxazine ring of FMN; its imidazole ring interacts directly with the N3 cluster iron atom  
203 and forms a hydrogen bond with S $\gamma$  of <sup>F</sup>Cys357 coordinating N3 (Figure 3A). <sup>F</sup>His400 is  
204 solvent-accessible even in the presence of NADH, and therefore, may become protonated  
205 upon N3 reduction. <sup>F</sup>Arg320 is positioned such that it can form hydrogen bonds with the  
206 ribose moiety of the NADH nicotinamide group and may stabilize bound dinucleotide (Figure  
207 3A). Both Arg320<sup>F</sup> and His400<sup>F</sup> may serve to counter-balance the negative charges of  
208 electrons on N1a and N3 clusters and to increase protein stability. The structure does not  
209 reveal specific features explaining the decreased affinity for FMN in the reduced enzyme  
210 (Holt et al., 2016). This can be attributed to minor conformational changes in the pocket upon  
211 enzyme reduction.  
212 The Q-binding site in complex I is formed at the end of a crevice between NuoD and NuoB  
213 subunits (Baradaran et al., 2013). In *E. coli*, this wedge is formed by the 58–69 stretch of  
214 NuoB and the tip of the 220–225 loop from subunit NuoD. Both <sup>D</sup>Tyr273 and <sup>D</sup>His224, found  
215 in the proximity of bound decylubiquinone (Baradaran et al., 2013) are conserved in *E. coli*  
216 and point towards the quinone binding site, whereas the tip of the 218–223 loop is disordered  
217 as in most complex I structures.

## 218 Environment and potentials of iron-sulfur clusters

219  
220 At a resolution of 2.1 Å the atoms constituting the iron-sulfur clusters are resolved as  
221 independent density blobs. The conformation of side chains as well as the positions of  
222 hydrating waters in the primary and secondary interaction spheres are mostly unambiguously  
223 resolved (Figure 3). In *E. coli* complex I, cluster N1a can be reduced by NADH due to its

224 uniquely high potential ( $\sim -0.3$  V), differentiating it from other characterized species in which  
225 N1a cannot be reduced by NADH (Birrell et al., 2013; Zu et al., 2002). The potential of iron-  
226 sulfur clusters in proteins among other factors depends on solvent exposure, proximity of  
227 charged residues, and the number of hydrogen bonds formed between the cluster environment  
228 and sulfur atoms of clusters or coordinating cysteines (Denke et al., 1998; Fritz et al., 2002).  
229 Comparison of the chemical environment of N1a with other high-resolution structures of  
230 complex I revealed three specific differences explaining the higher potential of the N1a  
231 cluster (Table 5): (1) *E. coli*-specific <sup>E</sup>Asn142 forms a hydrogen bond with S<sub>γ</sub> of <sup>E</sup>Cys97  
232 coordinating the N1a cluster and with N1a S1 (Figure 3B), consistent with its mutation to Met  
233 decreasing potential by 53 mV (Birrell et al., 2013). (2) In *E. coli*, water molecule W74 forms  
234 a hydrogen bond with S<sub>γ</sub> of <sup>E</sup>Cys97. This water molecule resides in a hydrophilic cavity  
235 created by *E. coli* specific <sup>E</sup>Gly140, replacing the alanine residue found in other species. (3)  
236 Because of small differences in the backbone conformation of NuoF, the backbone nitrogen  
237 of <sup>F</sup>Gly97 can form a hydrogen bond with S<sub>γ</sub> of <sup>E</sup>Cys133 in *E. coli* and *Aquifex aeolicus* but  
238 not in *Ovis aries* (Figure 3B, Table 5).  
239 The environment of the other iron-sulfur clusters is mainly conserved. The differences in  
240 hydrogen donors to the clusters, cysteine sulfur atoms, and water molecules in the cluster  
241 vicinity are listed in Table 4. Clusters N3 and N2 are briefly discussed below as being the  
242 most interesting.  
243 Cluster N3 interacts with <sup>F</sup>His400, which is absent in other structurally characterized species;  
244 however, the potential of N3 is very similar between species (Leif et al., 1995; Yagi and  
245 Matsuno-Yagi, 2003). The effect of proximal His residue is likely compensated by <sup>F</sup>Trp363  
246 replacing the hydrogen bond donors (Glu or Gln) found in other species (Table 4).  
247 The potential of cluster N2, the electron donor to quinone, varies in different species (Hirst  
248 and Roessler, 2016) notably being lower in *E. coli* compared to its mammalian analogues (-

249 220 mV vs. -140 mV, respectively). However, the structure shows that the polar environment  
250 of N2 is very conserved (Figure 3C), including two water molecules, W211 and W438. Two  
251 arginines found in close proximity to the N2 cluster, Arg270<sup>D</sup> and Arg250<sup>D</sup>, have conserved  
252 positions despite <sup>49kDa</sup>Arg85 in the mammalian homologue (<sup>P</sup>Arg250) being dimethylated  
253 (Carroll et al., 2013). This modification prevents it from forming a hydrogen bond with  
254 <sup>B</sup>Cys63, which should decrease N2 potential in the mitochondrial enzyme. Therefore, finer  
255 structural differences including those in cluster geometry, are likely responsible for  
256 differences in potential, which can likely be explained by high-resolution structure-based  
257 modeling.

## 258 Structure of the membrane arm

259 The model of complete membrane arm, including the previously missing subunit NuoH  
260 (Efremov and Sazanov, 2011), was built into the density map with local resolution better than  
261 3.5 Å at the arm center and approximately 4.0 Å at its periphery (Figure 1A, Figure 1 - figure  
262 supplement 4). An additional density belt corresponding to the lipid nanodisc is clearly visible  
263 (Figure 1A, Movie 1) around the membrane-embedded region. It is flat in the plane of the  
264 membrane with a thickness of approximately 30 Å, and closely matches hydrophobic surface  
265 of the membrane arm. The belt locally bends next to the subunit NuoL at the region where it  
266 interacts with the long amphipathic helix and is thinned next to the <sup>H</sup>TMH1 (Movie 1).  
267 The structure of the membrane arm in the lipid nanodisc is very similar to the crystal structure  
268 of the detergent-solubilized membrane arm (Efremov and Sazanov, 2011) (RMSD of 1.1 Å  
269 over 12662 atoms) (Figure 4 - figure supplement 1). The curvature of the membrane arm  
270 observed previously (Efremov and Sazanov, 2011) was unchanged in the lipid environment,  
271 and therefore, is not an artifact of crystallization or solubilization (Verkhovskaya and Bloch,  
272 2012). Local structural differences in crystal structure include expected repositioning of

273 <sup>A</sup>TMH1 next to <sup>H</sup>TMH2 (Baradaran et al., 2013), and a change in conformation of the  
274 <sup>M</sup>TMH5-TMH6 loop (Figure 4 - figure supplement 1).

275 The fold of subunit NuoH is similar to the structures of *T. thermophilus* and of eukaryotic  
276 complexes with one important exception. The density for the N-terminus of NuoH (residues  
277 1-52) that includes <sup>H</sup>TMH1 and a part of <sup>H</sup>TMH1-TMH2 loop, is completely missing in the  
278 reconstructions of the membrane fragment and of complete complex I (Figure 1, Movie 1)  
279 suggesting that <sup>H</sup>TMH1 is very mobile in the lipid nanodisc. This helix is close to the border  
280 of the nanodisc, and nanodisc belt is thinned on the cytoplasmic surface of the nanodisc at the  
281 position where the density of <sup>H</sup>TMH1 disappears (Movie 1). Simultaneously there is sufficient  
282 room to accommodate the trans-membrane helix within the nanodisc.

283 The structures of the membrane fragment and entire complex I visualize a complete chain of  
284 charged residues connecting the Q-site with charged residues in antiporter-like subunits.  
285 (Figure 4A). We analyzed the environment of ionizable residues found within the ‘E-channel’  
286 (Baradaran et al., 2013), a region situated between the Q-cavity and antiporter-like subunit  
287 NuoN, to evaluate the existence of a continuous proton translocation path linking the Q-cavity  
288 with the antiporter-like subunits suggested for ovine complex I (Kampjut and Sazanov, 2020).

289 The trans-membrane region of *E. coli* NuoH contains fewer charged residues than its  
290 homologues from other structurally characterized species (Figure 4 - figure supplement 2).  
291 Here, only *E. coli*-specific <sup>H</sup>His208, separated from <sup>H</sup>Glu157 by 12 Å, is found in the center  
292 of the membrane-embedded region of NuoH (Figure 4A). However, a large hydrophilic cavity  
293 stretches from the Q-site towards the center of subunit NuoH, ending next to the invariant  
294 <sup>H</sup>**Glu157** (hereafter, invariant residues are marked in bold). Although <sup>H</sup>**Glu157** is not directly  
295 linked to the cavity, DOWSER++ (Morozenko and Stuchebrukhov, 2016) placed waters  
296 linking it to the cavity, suggesting that this glutamic acid can exchange protons with the Q-  
297 cavity.

298 The region between NuoH and NuoN includes 6 ionizable side chains located in the middle of  
299 the membrane bilayer, 4 of which are invariant (Figure 4A,B). The distances between the  
300 residues vary from 5 Å to 12 Å which requires either displacement of the side chains or  
301 presence of water molecules to enable proton exchange between them. Analysis of cavities  
302 and potential hydration sites using DOWSER++ shows that the cluster of <sup>H</sup>Glu157 and  
303 <sup>A</sup>Asp79 along with the carbonyl oxygen of <sup>J</sup>Gly61 forming a  $\pi$ -bulge on the <sup>J</sup>TM3 (similar to  
304 the X-ray structure) (Efremov and Sazanov, 2011), indicate a hydrophilic cavity that can  
305 accommodate several water molecules, enabling proton exchange between these two residues.  
306 Carboxyl groups of a chain comprising <sup>J</sup>Glu55-<sup>K</sup>Glu36-<sup>K</sup>Glu72-<sup>N</sup>Glu133 are separated by  
307 cavities that can potentially be hydrated, enabling proton exchange between the residues. In *E.*  
308 *coli* complex I, residues <sup>A</sup>Asp79 and <sup>J</sup>Glu55/<sup>K</sup>Glu36 are separated by a distance exceeding 12  
309 Å and a region packed with hydrophobic residues, making proton exchange between the Q-  
310 site and NuoN unlikely. <sup>A</sup>Glu81, located opposite <sup>A</sup>Asp79 on <sup>A</sup>TMH2, apparently does not  
311 participate in linking <sup>A</sup>Asp79 with <sup>N</sup>Glu133. However, it faces hydrophilic environment of  
312 <sup>J</sup>Ser145, *E. coli*-specific <sup>J</sup>Glu142, and <sup>A</sup>Glu102, potentially linking it to the periplasmic  
313 surface (Figure 4A). Our analysis indicated that in *E. coli*, the E-channel is less pronounced  
314 than in *T. thermophilus* and that no continuous proton path exists between the Q-site and  
315 NuoN.  
316 Curiously, <sup>H</sup>Lys274 almost universally conserved in complex I and related hydrogenases is  
317 found in the <sup>H</sup>TMH7 off the main pathways proposed for proton translocation. In our  
318 structure, its ammonium group is oriented towards the periplasm (Figure 4A); however, the  
319 length and flexibility of the side chain would allow it to reach the center of the membrane  
320 upon structural rearrangement.  
321 The cytoplasmic half of <sup>J</sup>TMH3 was found to assume two alternative conformations in  
322 eukaryotic complex I (Agip et al., 2018; Kampjut and Sazanov, 2020). In *E. coli* complex I,

323 the density in this region is very well-resolved, suggesting the absence of alternative  
324 conformations. A peculiar feature is observed in the density of subunit NuoM instead.  
325 The density of the cytoplasmic half of <sup>M</sup>TM8 is poor and fragmented between residues 255  
326 and 265, indicating the existence of multiple conformations (Figure 4C, Movie 2). This region  
327 is buried in the middle of NuoM and the density of surrounding helices is very well-resolved  
328 indicating the local character of the disorder. This region spans the invariant **Lys265**  
329 including the  $\pi$ -bulge, and found in some bacteria <sup>M</sup>Asp258. Interestingly, though the helix  
330 structure in mammalian complex I is similar to that in *E. coli* (the equivalent Asp is missing),  
331 the corresponding region in *T. thermophilus* differs significantly (Figure 4C). The  
332 cytoplasmic region of <sup>13</sup>TM8 is rotated by 2 residues. This is achieved by extending TMH8 at  
333 *T. thermophilus* <sup>13</sup>Lys 235 (equivalent to *E. coli* <sup>M</sup>Lys265). In *E. coli*, <sup>M</sup>Lys265 is buried in  
334 the center of the second structural repeat whereas in *T. thermophilus*, <sup>13</sup>Lys 235 is positioned at  
335 the interface between the structural repeats facing <sup>13</sup>His218 (in *E. coli* <sup>M</sup>His248). This rotation  
336 places <sup>13</sup>Asp228 (equivalent to *E. coli* <sup>M</sup>Asp258) pointing towards central axis of the first  
337 structural repeat (TM4-8) and exposed to the cytoplasm, whereas in *E. coli*, it is buried on the  
338 central axis of the second structural repeat (TM9-TM13). Thus, higher mobility of the helical  
339 fragment situated at a critical position at the interface of symmetry-related modules may  
340 indicate  $\pi$ -bulge-enabled helical rotation with a possible role in proton translocation.

### 341 The peripheral-membrane arm interface

342 The interface between membrane and peripheral arms presents an important element of the  
343 complex that mediates the coupling of ubiquinone reduction above the cytoplasmic surface to  
344 proton translocation across the membrane. The interface between peripheral and membrane  
345 arms is primarily formed through interaction between subunits NuoB and NuoD of the  
346 peripheral arm with the cytoplasmic surface of NuoH and the TMH1-TMH2 loop of subunit

347 NuoA in the membrane domain. The residues involved in the direct interaction between the  
348 arms and the interface structure are highly conserved (Figure 5 - figure supplement 1)  
349 between all complex I and related membrane-bound hydrogenases (Baradaran et al., 2013;  
350 Grba and Hirst, 2020; Kampjut and Sazanov, 2020; Yu et al., 2020; 2018).  
351 Local resolution (Figure 1 - figure supplement 4) and B-factors (Figure 5 - figure supplement  
352 2) of the *E. coli* peripheral arm show that the membrane-facing surface (subunits NuoD and  
353 NuoB) including the residues lining the Q-cavity are significantly less ordered than the  
354 remaining subcomplex. The mobility in the interfacial region of the arm is very similar in the  
355 reconstructions of the peripheral arm dissociated from and complexed with the membrane  
356 arm. However, several interfacial regions of subunits NuoB, NuoD, and NuoI become more  
357 ordered upon complex formation and their density can be observed in the reconstruction of  
358 isolated conformations of the entire complex I (Figure 5 - figure supplement 2, Table 2).  
359 Similar to complex I from *T. thermophilus* (Baradaran et al., 2013), there are no specific  
360 conformational changes at the interface upon association of the arms. These results suggest  
361 that the interfacial region of the peripheral arm is inherently flexible and likely responsible, at  
362 least in part, for the high relative mobility of the arms.  
363 Structure of the surface of subunit NuoH and relative arrangement of subunits NuoB and  
364 NuoD in *E. coli* complex I is similar to that of complex I from other species (RMSD 1.2 Å  
365 over 324 C $\alpha$  atoms with *T. thermophilus* complex I). However, their relative positions differ.  
366 Thus, in *E. coli* complex I, NuoB and NuoD are rotated around an axis passing through the  
367 center of NuoH and the interface between NuoF and NuoG anticlockwise when observed  
368 from the top of peripheral arm at approximately 15 degrees (Figure 5A). This results in the  
369 shift of NuoD interfacial regions with an amplitude exceeding 10 Å and the separation of  
370 NuoD from NuoH, which reduces the interaction between the four-helical bundle domain of  
371 NuoD with NuoH (Figure 5B). The highly conserved fragment of the <sup>A</sup>TMH1-TMH2 loop

372 (residues 46-53), that forms a plug between subunits NuoD and NuoB (Figure 5 - figure  
373 supplement 1B) and interacts with the <sup>D</sup>221-228 loop containing ubiquinone-coordinating  
374 His224, is also disordered in our structure (Figure 5B).

375 On the opposite side of the interface, structural rearrangements include a 7-degree tilt of  
376 <sup>A</sup>TMH1 that becomes more perpendicular to the membrane plane and approximately 15-  
377 degree rotation of the amphipathic helix in the loop connecting <sup>H</sup>TMH1-TMH2, residues 57-  
378 68, in the direction of <sup>H</sup>TMH1 and towards the membrane center (Figure 5C). Analysis of the  
379 three full conformations identifies this helix as the main membrane arm element that performs  
380 rearrangement together with the cytoplasmic domain. Its rotation reduces the opening to the  
381 Q-cavity (Figure 5D). Homology modeling indicates that the observed rearrangements are  
382 still compatible with <sup>H</sup>TMH1 occupying its expected position without any steric clashes  
383 (Figure 5D) suggesting that <sup>H</sup>TMH1 is highly mobile in the lipid environment rather than  
384 being absent from its expected position.

385 Rotation of the NuoB/NuoD subunits module creates multiple openings on the interface  
386 between the arms (Figure 5B). The size of the openings is compatible with the diffusion of  
387 water molecules and likely, of protons from the outer space towards the Q-cavity. Such  
388 openings suggest that ubiquinone bound to the Q-site can receive protons directly from the  
389 solvent.

## 390 Discussion

### 391 Structural features of *E. coli* complex I

392 *E. coli* complex I is composed of the smallest number of subunits among all complex I  
393 structures characterized so far. Yet it still evolved a strategy to stabilize peripheral arm  
394 assembly without involving additional subunits. The interactions between subunits are  
395 stabilized by extended C-termini and a large G-loop (Figure 2), in turn stabilized by the Ca<sup>2+</sup>



396 ion, which is known to modulate the complex stability (Sazanov, 2003). This indicates an  
397 evolutionary pressure on maintaining the peripheral arm integrity, which was ‘solved’ in a  
398 species-dependent manner.

399 There is no apparent continuous proton translocation path between the Q-cavity and subunit  
400 NuoN in *E. coli* complex I. Further, there are no indications for the existence of different  
401 conformations in the cytoplasmic half of <sup>J</sup>TMH3 observed in mammalian complex I (Agip et  
402 al., 2018; Kampjut and Sazanov, 2020) attributed to deactive-active transition (Agip et al.,  
403 2018) or more recently, to different catalytic intermediates (Kampjut and Sazanov, 2020).  
404 This suggests that these states are either suppressed in the resting state of the bacterial  
405 complex or do not occur at all. Conversely, <sup>M</sup>TMH8 displays localized disorder next to the  $\pi$ -  
406 bulge, indicating involvement of this helix in the structural rearrangements associated with  
407 proton translocation, and to our knowledge, represents the first indication of specific  
408 conformational changes in antiporter-like subunits.

409 *E. coli* complex I is known to be a dynamic complex (Morgan and Sazanov, 2008; Sazanov,  
410 2003). Our cryo-EM reconstructions reveal the reasons for its high flexibility. The peripheral  
411 and membrane arms are mainly rigid, whereas the connection between arms is flexible  
412 (Figure 1C, Figure 1 – figure supplement 5). Two reasons can be identified for this: 1) high  
413 mobility of the interfacial regions of subunits NuoB and NuoD (Figure 1 - figure supplement  
414 4, Figure 5 - figure supplement 2) and 2) the 15-degree rotation of the interfacial subunits  
415 NuoB and NuoD relative to NuoH, observed uniquely in *E. coli* (Figure 5A). The rotation  
416 disrupts many conserved complimentary interactions between the arms and renders the  
417 interface porous such that the Q-cavity is exposed to the solvent. This is different from all the  
418 other known structures of complex I and evolutionarily related complexes in which the  
419 interface is solvent-inaccessible. Therefore, we interpreted the observed conformation of *E.*  
420 *coli* complex I as an uncoupled state. Our preparation of the complex is competent in

421 ubiquinone reduction (Figure 1 - figure supplement 2); however, unless conformational  
422 changes sealing the Q-cavity occur during the catalytic cycle, ubiquinone reduction by NADH  
423 in the present conformation is expected to occur without proton translocation.

424 The reasons for this difference in interface conformation with other structurally characterized  
425 complexes are not clear. It may represent a resting state described in *E. coli* complex I  
426 (Belevich et al., 2017), which like in eukaryotes (Babot et al., 2014), is characterized by lower  
427 catalytic activity and is activated by NADH:ubiquinone oxidoreduction cycles. However,  
428 reactive states in eukaryotic complex I are associated with local conformational changes  
429 involving loop rearrangement (Agip et al., 2018; Parey et al., 2018), rather than displacement  
430 of the complete domains observed in *E. coli* complex I. Other reasons for the observed  
431 rotation of arms may include the higher concentration of divalent ions used in our sample that  
432 weakens multiple salt bridges linking the arms, or displacement of the amphipathic termini of  
433 subunits NuoB and NuoI due to the limited size of the nanodisc, resulting in weakened  
434 interaction between the arms.

435 The absence of density for <sup>H</sup>TMH1 is another unique feature of *E. coli* complex I. It likely  
436 reflects the higher dynamics of this helix in lipid environment. Possibly, tilted <sup>A</sup>TMH1  
437 (Figure 5C) displaces the periplasmic end of <sup>H</sup>TMH1 disrupting its interaction with the  
438 TMH2-3 loop and TMH6 of NuoH, rendering this helix dynamic. It may also have a  
439 functional role because helix displacement facilitates the otherwise too narrow access to the  
440 Q-cavity for ubiquinone (Baradaran et al., 2013). Further insights into the role of <sup>H</sup>TMH1  
441 might be obtained once conditions stabilizing the coupled complex conformation are  
442 identified.

#### 443 Revised coupling mechanism

444 Based on structural features of *E. coli* complex I and the wealth of available structural  
445 information, we would like to propose a coupling mechanism that differs from those

446 suggested previously (Figure 6), which is simple, compatible with the microscopic  
447 reversibility principle (Onsager et al., 1996), has evolutionary meaning, and is applicable to  
448 the entire class of evolutionarily related complexes.

449 We propose that the key to the coupling is the formation of a cavity isolated from external  
450 protons and accessible to ubiquinone such that ubiquinone can exchange electrons with the  
451 N<sub>2</sub> cluster. The necessity of having a tightly coupled cavity explains the high conservation of  
452 the subunit interface. Notably, as the ubiquinone entrance is situated in the hydrophobic  
453 region of the bilayer, these two requirements do not contradict each other.

454 The potential of benzoquinone-hydroquinone couple depends on the pH (Chambers, 1988),  
455 similar to that of any redox reaction involving protons, and has been shown experimentally to  
456 decrease by over 400 mV to below -300 mV upon pH change from 2 to 10 (Lemmer et al.,  
457 2011). Rough estimations indicate that addition or extraction of a single proton from a cavity  
458 with the characteristic dimensions of the Q-cavity, alters the activity of protons within the  
459 cavity by hundreds of millivolts. Thus, the redox potential of ubiquinone bound within the  
460 cavity enclosed from the environment will be strongly modulated by the extraction/addition of  
461 single protons from/to the cavity. *Vice versa*, reduction or oxidation of ubiquinone/ubiquinol  
462 is equivalent to adding/removing proton binding groups to/from the Q-cavity. Thus,  
463 ubiquinone serves as a transformer that converts the energy of electrons to the chemical  
464 potential of protons in a fully reversible manner. In the coupled complex during the forward  
465 cycle, ubiquinone reduction decreases proton activity in the cavity, which is rectified by  
466 protons entering the cavity and performing work. Questions of how the protons perform the  
467 work and where they come from are thus critical to formulate the coupling mechanism.

468 Multiple proton pathways have been suggested (Baradaran et al., 2013; Efremov and  
469 Sazanov, 2012; Kampjut and Sazanov, 2020; Verkhovskaya and Bloch, 2012; Yu et al., 2020;  
470 2018). However, they all end up on intracellular/matrix side of the membrane, which makes it

471 difficult to explain the energy conversion mechanism. Instead, we propose that the protons re-  
472 protonate ubiquinone through NuoH and/or adjacent trans-membrane subunits from the  
473 periplasmic/inter membrane side of the membrane as shown in [Figure 6](#). The fold of subunit  
474 NuoH contains a set of 5 TMH with a helical arrangement similar to the symmetric module in  
475 antiporter-like subunits including broken TMH (Baradaran et al., 2013) and invariant  
476 <sup>H</sup>Glu157 in a position similar to the invariant <sup>M</sup>Glu144, suggesting that it can translocate  
477 protons. Proton transport through NuoH is coupled to the transport of three protons by three  
478 antiporter-like subunits in the opposite direction. This coupling must involve both the  
479 interaction of ionizable residues in the middle of the membrane (Baradaran et al., 2013;  
480 Efremov and Sazanov, 2011) as well as conformational changes, and likely proceeds through  
481 a classical alternating access mechanism (Jardetzky, 1966). Thus, the entire membrane  
482 module functions as a reversible proton antiporter with the stoichiometry of  $1\text{H}^+_{\text{in}}/3\text{H}^+_{\text{out}}$ . Four  
483 protons are translocated outside in two pumping cycles per one reduced ubiquinone molecule  
484 ([Figure 6](#)). In this mechanism, ubiquinone reduction creates a local enhanced membrane  
485 potential on the NuoH subunit between the Q-cavity and periplasmic space. Moreover, only  
486 the equilibrium potential of NADH and ubiquinone as well as the transmembrane potential  
487 are important for the directionality of the reaction and energy balance as expected for a  
488 molecular machine (Astumian et al., 2016).

489 Under equilibrium, the potential of ubiquinone in the Q-cavity is equilibrated with the  
490 potential of NADH, and of protons in the Q-cavity, which results in trans-membrane  
491 potential-dependent semiquinone species as observed by EPR spectroscopy in tightly coupled  
492 submitochondrial particles (Yano et al., 2005).

493 The proposed mechanism is applicable to all the complexes that are evolutionary related to  
494 complex I (Efremov and Sazanov, 2012; Yu et al., 2020; 2018). In all of these, the cavity  
495 formed between the peripheral arm and NuoH subunit is sealed. The peripheral arm-NuoH

496 complex is undoubtedly one of the stand-alone evolutionary modules. This is supported by the  
497 differences in its position between complex I and membrane-bound hydrogenases (Yu et al.,  
498 2020; 2018), and its susceptibility to dissociation from the membrane arm in *E. coli*  
499 (Baranova et al., 2007; Efremov and Sazanov, 2011) as expected for a late evolutionary  
500 addition (Levy et al., 2008). The initial association of the hydrogen-evolving module with an  
501 antiporter may have had an evolutionary advantage with the proton-translocating module  
502 serving as a source of protons (Yu et al., 2018), biasing H<sub>2</sub> evolution towards the reaction  
503 product or to enhance Na<sup>+</sup> extraction from the cells (Boyd et al., 2014).

504 Complex uncoupling is achieved by opening the Q-cavity to the solvent, consistent with  
505 elegant experiments by Cabrera-Orefice et.al (Cabrera-Orefice et al., 2018) in which the  
506 locking conserved the <sup>A</sup>TMH1-2 plug with the cysteine bridge reversibly uncoupled the  
507 enzyme. Close examination of the crosslinked structure indicates that crosslinking fixes the  
508 plug conformation in a way that the Q-cavity is accessible to the solvent.

509 The exact proton translocation mechanism within the antiporter-like module is unknown and  
510 requires further experimental and computational investigation. Here, we can only speculate  
511 that given the high conservation of <sup>H</sup>Glu157, it plays an important role in the coupling and  
512 likely changes its protonation state during the pumping cycle. Thus, it can influence the pK<sub>a</sub>  
513 of neighboring ionizable residues. In membrane-bound hydrogenase (MBH), an equivalent  
514 <sup>M</sup>Glu141 is separated from the closest ionizable <sup>H</sup>Lys409 by distance of 20 Å, which in a  
515 hydrophobic environment with a dielectric constant of 10, allow them to mutually modulate  
516 the pK<sub>a</sub> of each other by approximately 1 pH unit, similar to the free energy conserved upon  
517 ferredoxin oxidation by the protein complex. This distance is reduced to around 13 Å in  
518 membrane-bound sulfane sulfur reductase (MBS) and to around 6 Å in complex I, consistent  
519 with the proportionally higher free energy of catalyzed reactions (Yu et al., 2020; 2018).

520 The proposed coupling mechanism also suggests how the different conformational states  
521 associated with proton translocation might be trapped. A pH jump applied to purified coupled  
522 complex I will create a difference in potential between the Q-cavity and periplasmic surface,  
523 which depending on the direction of the jump, may trap different equilibrium conformations  
524 of this molecular machine.

525

## 526 Materials and Methods

### 527 Generation of an *E. coli* strain expressing Twin-Strep-tagged respiratory complex I

528 The native *nuo* operon encoding the 13 subunits of respiratory complex I (NuoA-N) was  
529 engineered with a Twin-Strep-tag (WSHPQFEKGGGSGGGSGGSAWSHPQFEK, IBA  
530 GmbH) at the N-terminus of NuoF using CRISPR-Cas9-enabled recombineering (Jiang et  
531 al., 2015). The DNA sequence encoding the C-terminal region of NuoE and N-terminus of  
532 NuoF was retrieved from GenBank (Acc. No. NC\_012971.2 region 2288438 – 2289174). The  
533 tag-coding sequence followed by a TEV protease recognition site (Tropea et al., 2009) was  
534 appended upstream of the NuoF N-terminus and was codon-optimized, together with the  
535 2288766–2288807 region of the genomic fragment. Such designed, linear DNA knock-in  
536 cassette was synthesized (GenScript). The vectors pCas and pTargetF were gifts from Sheng  
537 Yang (Addgene plasmids #62225 and #62226). The N20 sequence  
538 (GGTCAGCGGATGCGTTTCGG) was introduced into pTargetF by inverse PCR. Genomic  
539 engineering was performed according as described by Jiang *et al* (Jiang et al., 2015). Briefly,  
540 pCas vector was transformed into the chemically competent *E. coli* BL21AI strain (Thermo  
541 Fisher Scientific Inc.). The transformants were grown in shake-flask culture at 30°C in  
542 Lysogeny Broth (LB) medium containing 25 µg mL<sup>-1</sup> (w/v) kanamycin monosulfate and 10  
543 mM L-arabinose. Upon reaching OD<sub>600</sub> 0.5, the bacteria were rendered electrocompetent and

544 were co-electroporated with the linear DNA cassette and the mutated pTargetF vector. The  
545 transformants were selected on LB-agar plates supplemented with 25  $\mu\text{g mL}^{-1}$  (w/v)  
546 kanamycin and 50  $\mu\text{g mL}^{-1}$  (w/v) streptomycin, or 50  $\mu\text{g mL}^{-1}$  (w/v) spectinomycin. The  
547 positives, identified by colony PCR and DNA sequencing, were cured of the plasmids as  
548 described previously (Jiang et al., 2015). We further refer to the modified strain as *E. coli*  
549 BL21FS (NuoF-Strep).

#### 550 Expression and purification of respiratory complex I

551 *E. coli* BL21FS was cultivated in LB medium for 48 hours at 37°C in a microaerobic  
552 environment. The cells were harvested by centrifugation and the membrane fraction was  
553 isolated as described by Sazanov *et al* (Sazanov, 2003). All subsequent steps were performed  
554 at 4°C. The homogenate was solubilized in 2% (w/v) n-Dodecyl  $\beta$ -D-maltoside (DDM,  
555 Anatrace) for 2 hours while stirring, after which the non-solubilized fraction was removed by  
556 ultracentrifugation at 225 000  $\times g$  for 1 hour. The supernatant was adjusted to 200 mM NaCl  
557 and loaded on a 5 mL Strep-Tactin® Superflow® high capacity column (IBA GmbH). After  
558 washing with 25 column volumes (CV) of buffer A (50 mM Bis-tris pH 6, 2 mM CaCl<sub>2</sub>, 200  
559 mM NaCl, 0.04% (w/v) DDM, 10% (v/v) sucrose, 0.003% (w/v) *E. coli* polar lipid extract  
560 (Avanti Polar Lipids, EPL), 0.2 mM PMSF), complex I was eluted with 2 CV of buffer B  
561 (buffer A containing 5 mM D-desthiobiotin (IBA GmbH). The purity of the eluted protein  
562 was assessed by SDS-PAGE and activity assays (Figure 1 - figure supplement 1). The  
563 purified complex I was concentrated using an Amicon Ultra-4 100K centrifugal filter (Merck)  
564 to 0.5 mg mL<sup>-1</sup> (w/v), fast-frozen in liquid nitrogen and stored at -80°C.

#### 565 Reconstitution of respiratory complex I into lipid nanodiscs

566 The membrane scaffold protein MSP2N2 was expressed and purified following a published  
567 protocol (Grinkova et al., 2010). Purified complex I at concentration 520 nM was mixed with  
568 10.4  $\mu\text{M}$  MSP2N2 (1:20 protein:MSP molar ratio) and incubated for 1 hour at 4°C.

569 Subsequently, the detergent was removed by adding 0.5 g mL<sup>-1</sup> (w/v) Bio-Beads (Bio-Rad)  
570 overnight at 4°C. The reconstituted protein was further purified on the Superose 6 Increase  
571 10/300 GL column (GE Healthcare) equilibrated in a buffer comprising 20 mM Bis-Tris pH  
572 6.8, 200 mM NaCl and 2 mM CaCl<sub>2</sub>. The protein-containing fractions were pooled and  
573 concentrated to 0.1–0.2 mg mL<sup>-1</sup> (w/v) using Amicon Ultra-0.5 100K centrifugal  
574 concentrators.

#### 575 Activity assays

576 NADH:ferricyanide (FeCy) and NADH:ubiquinone-1 (Q1) activities were measured as  
577 described previously (Sazanov, 2003). For the assays, 3 nM of detergent-solubilized or  
578 nanodisc-reconstituted complex I and either 1 mM FeCy (Sigma Aldrich BVBA) or 100 μM  
579 Q1 (Sigma Aldrich BVBA) were added to the assay buffer (10 mM Bis-Tris pH 6.8, 200 mM  
580 NaCl, 10 mM CaCl<sub>2</sub>) in a stirred quartz cuvette at 30°C. The reaction was initiated by adding  
581 100 μM NADH (Carl-Roth GmbH) and followed as reduction in absorbance at 340 nm using  
582 a Varian Cary 300 UV-Vis spectrophotometer (Agilent Technologies, Inc). During the  
583 inhibition assay, complex I was incubated with 20 μM Piericidin A (Cayman Chemical) for 5  
584 min in the assay buffer at 30°C prior to Q1 addition.

#### 585 Mass photometry

586 The composition of the protein preparation was assessed using mass photometry on a Refeyn  
587 OneMP instrument (Refeyn Ltd.), which was calibrated using an unstained native protein ladder  
588 (NativeMark™ Unstained Protein Standard A, Thermo Fisher Scientific Inc.). Measurements  
589 were performed on the reconstituted complex I at a concentration of 0.015 mg ml<sup>-1</sup> using  
590 AcquireMP 2.2.0 software and were analyzed using the DiscoverMP 2.2.0 package.



## 591 Preparation of cryo-EM samples

592 The cryo-EM samples were prepared using a CP3 cryoplunge (Gatan). Quantifoil R0.6/1  
593 Cu300 holey carbon grids were cleaned with chloroform, acetone, and isopropanol as  
594 described by Passmore *et al* (Passmore and Russo, 2016) . The grids were glow discharged in  
595 the ELMO glow discharge system (Corduan Technologies) from both sides for 2 min at 11  
596 mA and 0.28 mbar. Four microliters of the reconstituted protein solution at 0.15 mg ml<sup>-1</sup>  
597 concentration were applied on a grid and blotted from both sides for 2.2 s with Whatman No.  
598 3 filter paper at 97 % relative humidity. The grid was then plunge-frozen in liquid ethane at -  
599 176°C and stored in liquid nitrogen.

## 600 Cryo-EM data collection

601 Cryo-EM images were collected on a JEOL CryoARM 300 microscope equipped with an in-  
602 column  $\Omega$  energy filter (Fislage et al., 2020) at 300 kV, automatically using SerialEM 3.0.8  
603 (Mastronarde, 2005) at a nominal magnification of 60,000 and the corresponding calibrated  
604 pixel size of 0.771 Å. Five images per single stage position were collected using a cross  
605 pattern with 3 holes along each axis (Efremov & Stroobants, 2021 in press). The 3 s  
606 exposures were dose-fractionated into 61 frames with an electron dose of 1.06 e<sup>-</sup> Å<sup>-2</sup> per  
607 frame. The energy filter slit was set to 20 eV width. In total, 9122 zero-loss micrographs were  
608 recorded with the defocus varying between -0.9 and -2.2  $\mu\text{m}$  (Table 1).

## 609 EM image processing

610 The dose-fractionated movies were motion-corrected using MotionCor2 (Zheng et al., 2017)  
611 in the patch mode. The Contrast Transfer Function (CTF) parameters were estimated using  
612 CTFFIND-4.1 (Rohou and Grigorieff, 2015). 40 micrographs of various defoci were selected,  
613 manually picked, and used to train the neural network of crYOLO 1.4 (Wagner et al., 2019).  
614 After training, 1,256,734 particles were picked automatically from the complete dataset,

615 extracted in RELION 3.0 (Zivanov et al., 2018), and imported into cryoSPARC 2.11<sup>11</sup>.  
616 Following 2D classification, six initial models were generated, among which one  
617 corresponded to the cytoplasmic arm-only and another corresponded to the complete complex  
618 I. Using hetero-refinement, 441,265 and 525,680 particles were assigned to the cytoplasmic  
619 arm and complete complex, respectively. Further processing was performed in RELION  
620 3.1 (Zivanov et al., 2020). After per-particle CTF estimation and Bayesian polishing, 3D auto-  
621 refinement of the complete complex produced a map at an average resolution of 3.4 Å (Figure  
622 1 - figure supplement 3). However, the map was very heterogeneous with the peripheral arm  
623 resolved at 3.0–3.6 Å whereas the membrane arm was resolved at over 10 Å.  
624 To address this heterogeneity, both arms were refined independently using multi-body  
625 refinement (Nakane et al., 2018) (Figure 1 - figure supplement 3) and the peripheral domain  
626 signal was subtracted. After two rounds of 3D classification applied to the membrane domain  
627 and nanodisc signal subtraction, a subset of 48,745 particles was 3D refined to an average  
628 resolution of 3.6 Å. However, the density map was anisotropic. To improve the  
629 reconstruction, the original stack of 525,680 particles was refined against the masked  
630 cytoplasmic arm, followed by subtraction of the signal from the peripheral arm. Next,  
631 membrane arm map obtained above was filtered to 9 Å and used as an initial model for the 3D  
632 refinement of all resulting membrane arm particles. Next, to prevent model bias, the refined  
633 map was low-pass filtered to 20 Å and used in the subsequent 3D classification with 10  
634 classes,  $\tau$  of 12 and 24° local angular search range and 1.8° angular step. The best class  
635 (110,258 particles and 8 Å resolution) was auto-refined using the starting model low-pass  
636 filtered to 15 Å, which produced the reconstruction to a resolution of 4.4 Å. Next, the  
637 nanodisc density was subtracted, which further improved the resolution to 3.9 Å. Following  
638 3D classification without alignment with  $\tau$  of 40, 8 classes, and resolution in the E-step  
639 limited to 4 Å, a subset of 37,441 particles was identified, which after auto refinement,

640 produced a density map at an average resolution of 3.9 Å with better resolved peripheral  
641 regions. Finally, density modification with the `resolve_cryo_em` tool available in PHENIX  
642 1.18.2 (Terwilliger et al., 2020) improved the resolution to 3.7 Å (Figure 1 - figure  
643 supplement 3,4).

644 After multibody refinement of the arms described above, peripheral arm particles with the  
645 subtracted membrane arm were 3D classified into 12 classes without alignment using  $\tau$  of 40  
646 and resolution of the expectation step limited to 4 Å. The best class contained 134,976  
647 particles and was further refined to 2.9 Å resolution.

648 A subset of 166,580 particles was selected after a similar 3D classification procedure that was  
649 applied to the 441,265 particles of dissociated peripheral arm particles. It was further cleaned  
650 from the remaining particles of the complete complex I by 2D classification, resulting in a  
651 subset of 151,357 particles that produced a density map to a resolution of 3.0 Å. As the  
652 reconstructions of the dissociated and membrane arm-subtracted cytoplasmic arms were  
653 virtually identical, both stacks were combined. After two cycles of per-particle CTF  
654 refinement, aberration corrections, and Bayesian particle polishing in RELION 3.1, the  
655 resolution improved to 2.4 Å. Consecutive density modification in PHENIX further improved  
656 the resolution to 2.1 Å (Figure 1 - figure supplement 3,4, Table 1).

657 To resolve the conformation of entire complex I, a stack of 525,680 particles was aligned to  
658 the peripheral arm using auto-refinement with a mask around the peripheral arm in RELION  
659 3.1. Next, 3D classification without alignment into 30 classes with resolution of the  
660 expectation step limited to 20 Å and  $\tau$  of 4 was performed, followed by auto-refinement of  
661 each resulting class, which produced maps to a resolution in the range of 9-20 Å (some of the  
662 classes are shown in Figure 1 - figure supplement 5).

663 Three high-resolution conformations of complete complex I were obtained as follows.

664 Conformation 1 was resolved by applying the 3D classification into 15 classes,  $\tau$  of 6, a 24°

665 local angular search range, and 1.8° sampling interval to the subset of 110,258 particles that  
666 produced the 3.9 Å reconstruction of the membrane arm (see above). The best class consisted  
667 of 23,445 particles that were refined to a resolution of 3.9 Å.

668 Conformations 2 and 3, were identified by applying 3D classification without image  
669 alignment into 12 classes with  $\tau$  of 40 and resolution of the expectation step limited to 4 Å, to  
670 the stack of 525,680 intact complex I particles. Two of the best classes, consisting of 21,620  
671 and 21,234 particles were refined to 4.6 Å and 4.5 Å, respectively. Following density-  
672 modification in PHENIX, the resolution of the maps was improved to 3.3, 3.8, and 3.7 Å, for  
673 conformations 1, 2, and 3, respectively (Figure 1 - figure supplement 4C, Table 1).

#### 674 Model building

675 Peripheral arm subunits constituting NuoB, CD, E, F, G, and I were first homology modelled  
676 in the SWISS-MODEL server (Waterhouse et al., 2018) based on the structure of *T.*  
677 *thermophilus* (PDB ID:4HEA (Baradaran et al., 2013)) and were rigid-body fitted into the  
678 density map in UCSF Chimera 1.13.1. Following manual rebuilding in Coot 0.9 (Casañal et  
679 al., 2020), the model was subjected to real-space refinement against the final 2.1 Å map of  
680 the cytoplasmic arm in PHENIX 1.18.2 using the default parameters. Secondary structure  
681 restraints were applied only to the interfacial region resolved at a lower resolution. The value  
682 of the nonbonded\_weight parameter was optimized. Water molecules were added to the map  
683 and validated using the “Check/delete waters” tool in Coot 0.9 . Molecular dynamics-based  
684 model idealization was conducted in ISOLDE 1.0b5 (Croll, 2018), followed by several  
685 iterations of real-space refinement without atomic displacement parameter (ADP) restraints  
686 and manual rebuilding in Coot 0.9.

687 For the membrane domain, the previously obtained *E. coli* model (PDB ID: 3RKO) was real-  
688 space-refined in PHENIX. The missing NuoH subunit was homology-modelled using the *T.*  
689 *thermophilus* structure (PDB ID: 4HEA) in Coot 0.9. The final model was obtained after

690 several rounds of manual rebuilding and real-space refinement using standard parameters with  
691 Ramachandran restrains, secondary-structure restrains applied to the NuoL TMH9-13,  
692 without ADP restrains, and with the optimized nonbonded\_weight parameter. To generate the  
693 model of the complete complex I, the separate peripheral and membrane arm structures were  
694 combined and the missing parts at the interface (Table 2) were built manually. As the density  
695 of NuoL and NuoM was very poor in all the resolved full conformations, these subunits were  
696 subjected to rigid-body refinement in PHENIX, whereas the others were subjected to real-  
697 space refinement with minimization\_global, local\_grid\_search, morphing, and ADP  
698 refinement. Ramachandran, ADP, and secondary-structure restrains were used. After manual  
699 rebuilding in Coot, real-space refinement of the full complex was performed with standard  
700 parameters and restrains. The models were validated in MolProbity (Williams et al., 2018) .  
701 Structural conservation was evaluated using the ConSurf server (Ashkenazy et al., 2016). The  
702 figures and movies were generated in UCSF ChimeraX version 1.1. (Goddard et al., 2018)  
703 and PyMOL (The PyMOL Molecular Graphics System, Version 2.4.1 Schrödinger, LLC).

704

#### 705 Acknowledgements

706 We are indebted to Henri De Greve for help with establishing CRISPR-Cas9 for *E. coli* complex I. We are  
707 thankful to Dr. Adam Schröfel and Dr. Marcus Fislage for providing support during cryo-EM data collection, to  
708 Annelore Stroobants for technical assistance and to Lukasz Milewski for assistance in data processing. We  
709 kindly thank VIB Tech Watch fund for facilitating access to the Refeyn instrument. We would like to  
710 acknowledge the funding provided by Vlaams Instituut voor Biotechnologie, Fonds Wetenschappelijk  
711 Onderzoek (grant Nos. G0H5916N, G.0266.15N) and by the European Research Council.

712

#### 713 Data availability

714 Cryo-EM density maps and atomic models are deposited into the PDB and EMDB databases with the following  
715 accession codes: cytoplasmic domain (PDB ID: 7NZ1, EMD-12661), membrane domain (PDB ID: 7NYH,  
716 EMD-12652), entire complex conformation 1 (PDB ID: 7NYR, EMD-12653), conformation 2 (PDB ID: 7NYU,  
717 EMD-12654), conformation 3 (PDB ID: 7NYV, EMD-12655).

718

719 The following data sets were generated:

720

721 Kolata P, Efremov RG (2021). Electron Microscopy Data Bank ID EMD-12661. Respiratory complex I from  
722 *Escherichia coli* - focused refinement of cytoplasmic arm. <https://www.ebi.ac.uk/pdbe/entry/emdb/EMD-12661>  
723 Kolata P, Efremov RG (2021). Electron Microscopy Data Bank ID EMD-12652. Respiratory complex I from  
724 *Escherichia coli* - focused refinement of membrane arm. <https://www.ebi.ac.uk/pdbe/entry/emdb/EMD-12652>  
725 Kolata P, Efremov RG (2021). Electron Microscopy Data Bank ID EMD-12653. Respiratory complex I from  
726 *Escherichia coli* - conformation 1. <https://www.ebi.ac.uk/pdbe/entry/emdb/EMD-12653>

727  
728 Kolata P, Efremov RG (2021). Electron Microscopy Data Bank ID EMD-12654. Respiratory complex I from  
729 Escherichia coli - conformation 2. <https://www.ebi.ac.uk/pdbe/entry/emdb/EMD-12654>  
730 Kolata P, Efremov RG (2021). Electron Microscopy Data Bank ID EMD-12655. Respiratory complex I from  
731 Escherichia coli - conformation 3. <https://www.ebi.ac.uk/pdbe/entry/emdb/EMD-12655>  
732  
733 Kolata P, Efremov RG (2021). RCSB Protein Data Bank ID 7NZ1. Respiratory complex I from Escherichia coli  
734 - focused refinement of cytoplasmic arm. <https://www.rcsb.org/structure/7NZ1>  
735 Kolata P, Efremov RG (2021). RCSB Protein Data Bank ID 7NYH. Respiratory complex I from Escherichia coli  
736 - focused refinement of membrane arm. <https://www.rcsb.org/structure/7NYH>  
737 Kolata P, Efremov RG (2021). RCSB Protein Data Bank ID 7NYR. Respiratory complex I from Escherichia coli  
738 - conformation 1. <https://www.rcsb.org/structure/7NYR>  
739 Kolata P, Efremov RG (2021). RCSB Protein Data Bank ID 7NYU. Respiratory complex I from Escherichia coli  
740 - conformation 2. <https://www.rcsb.org/structure/7NYU>  
741 Kolata P, Efremov RG (2021). RCSB Protein Data Bank ID 7NYV. Respiratory complex I from Escherichia coli  
742 - conformation 3. <https://www.rcsb.org/structure/7NYV>  
743  
744 Competing interests  
745 Authors declare no competing interests.  
746

## 747 References

748 Agip A-NA, Blaza JN, Bridges HR, Viscomi C, Rawson S, Muench SP, Hirst J. 2018. Cryo-  
749 EM structures of complex I from mouse heart mitochondria in two biochemically defined  
750 states. *Nat Struct Mol Biol* **25**:1–13. doi:10.1038/s41594-018-0073-1  
751 Ashkenazy H, Abadi S, Martz E, Chay O, Mayrose I, Pupko T, Ben-Tal N. 2016. ConSurf  
752 2016: an improved methodology to estimate and visualize evolutionary conservation in  
753 macromolecules. *Nucleic Acids Research* **44**:W344–50. doi:10.1093/nar/gkw408  
754 Astumian RD, Mukherjee S, Warshel A. 2016. The Physics and Physical Chemistry of  
755 Molecular Machines. *ChemPhysChem* **17**:1719–1741. doi:10.1002/cphc.201600184  
756 Babot M, Birch A, Labarbuta P, Galkin A. 2014. Characterisation of the active/de-active  
757 transition of mitochondrial complex I. *Biochim Biophys Acta* **1837**:1083–1092.  
758 doi:10.1016/j.bbabi.2014.02.018  
759 Baradaran R, Berrisford JM, Minhas GS, Sazanov LA. 2013. Crystal structure of the entire  
760 respiratory complex I. *Nature* **494**:443–448. doi:10.1038/nature11871  
761 Baranova EA, Holt PJ, Sazanov LA. 2007. Projection structure of the membrane domain of  
762 Escherichia coli respiratory complex I at 8 Å resolution. *Journal of Molecular Biology*  
763 **366**:140–154. doi:10.1016/j.jmb.2006.11.026  
764 Belevich N, Ballmoos von C, Verkhovskaya M. 2017. Activation of Proton Translocation by  
765 Respiratory Complex I. *Biochemistry* **56**:5691–5697. doi:10.1021/acs.biochem.7b00727  
766 Birrell JA, Morina K, Bridges HR, Friedrich T, Hirst J. 2013. Investigating the function of  
767 [2Fe–2S] cluster N1a, the off-pathway cluster in complex I, by manipulating its reduction  
768 potential. *Biochemical Journal* **456**:139–146. doi:10.1042/BJ20130606  
769 Boyd ES, Schut GJ, Adams M, Microbe JP. 2014. Hydrogen metabolism and the evolution of  
770 biological respiration. *Microbe* **9**:361–367.  
771 Cabrera-Orefice A, Yoga EG, Wirth C, Siegmund K, Zwicker K, Guerrero-Castillo S,  
772 Zickermann V, Hunte C, Brandt U. 2018. Locking loop movement in the ubiquinone  
773 pocket of complex I disengages the proton pumps. *Nature Communications* **9**:1–10.  
774 doi:10.1038/s41467-018-06955-y

- 775 Carroll J, Ding S, Fearnley IM, Walker JE. 2013. Post-translational Modifications near the  
776 Quinone Binding Site of Mammalian Complex I. *Journal of Biological Chemistry*  
777 **288**:24799–24808. doi:10.1074/jbc.M113.488106
- 778 Casañal A, Lohkamp B, Emsley P. 2020. Current developments in Coot for macromolecular  
779 model building of Electron Cryo-microscopy and Crystallographic Data. *Protein Sci*  
780 **29**:1069–1078. doi:10.1002/pro.3791
- 781 Chambers JQ. 1988. Electrochemistry of quinones, *The Quinonoid Compounds: Vol. 1*  
782 (1988). Chichester, UK: John Wiley & Sons, Ltd. doi:10.1002/9780470772119.ch12
- 783 Croll TI. 2018. ISOLDE: a physically realistic environment for model building into low-  
784 resolution electron-density maps. *Acta Crystallogr D Struct Biol* **74**:519–530.  
785 doi:10.1107/S2059798318002425
- 786 Denke E, Merbitz-Zahradnik T, Hatzfeld OM, Snyder CH, Link TA, Trumpower BL. 1998.  
787 Alteration of the Midpoint Potential and Catalytic Activity of the Rieske Iron-Sulfur  
788 Protein by Changes of Amino Acids Forming Hydrogen Bonds to the Iron-Sulfur Cluster.  
789 *Journal of Biological Chemistry* **273**:9085–9093. doi:10.1074/jbc.273.15.9085
- 790 Efremov RG, Sazanov LA. 2012. The coupling mechanism of respiratory complex I - a  
791 structural and evolutionary perspective. *Biochim Biophys Acta* **1817**:1785–1795.  
792 doi:10.1016/j.bbabi.2012.02.015
- 793 Efremov RG, Sazanov LA. 2011. Structure of the membrane domain of respiratory complex I.  
794 *Nature* **476**:414–420. doi:10.1038/nature10330
- 795 Fiedorczuk K, Letts JA, Degliesposti G, Kaszuba K, Skehel M, Sazanov LA. 2016. Atomic  
796 structure of the entire mammalian mitochondrial complex I. *Nature* **538**:406–410.  
797 doi:10.1038/nature19794
- 798 Fislage M, Shkumatov AV, Stroobants A, Efremov RG. 2020. Assessing the JEOL CRYO  
799 ARM 300 for high-throughput automated single-particle cryo-EM in a multiuser  
800 environment. *IUCrJ* **7**:707–718. doi:10.1107/S2052252520006065
- 801 Fraaije MW, sciences AMTIB, 2000. 2000. Flavoenzymes: diverse catalysts with recurrent  
802 features. *Elsevier*  
803 **25**:126–132. doi:10.1016/S0968-0004(99)01533-9
- 804 Fritz G, Roth A, Schiffer A, Büchert T, Bourenkov G, Bartunik HD, Huber H, Stetter KO,  
805 Kroneck PMH, Ermler U. 2002. Structure of adenylylsulfate reductase from the  
806 hyperthermophilic *Archaeoglobus fulgidus* at 1.6-Å resolution. *Proceedings of the*  
807 *National Academy of Sciences* **99**:1836–1841. doi:10.1073/pnas.042664399
- 808 Galkin A, Drose S, Brandt U. 2006. The proton pumping stoichiometry of purified  
809 mitochondrial complex I reconstituted into proteoliposomes. *Biochimica et Biophysica*  
810 *Acta (BBA) - Bioenergetics* **1757**:1575–1581. doi:10.1016/j.bbabi.2006.10.001
- 811 Goddard TD, Huang CC, Meng EC, Pettersen EF, Couch GS, Morris JH, Ferrin TE. 2018.  
812 UCSF ChimeraX: Meeting modern challenges in visualization and analysis. *Protein Sci*  
813 **27**:14–25. doi:10.1002/pro.3235
- 814 Grba DN, Hirst J. 2020. Mitochondrial complex I structure reveals ordered water molecules  
815 for catalysis and proton translocation. *Nat Struct Mol Biol* **1**–20. doi:10.1038/s41594-020-  
816 0473-x
- 817 Grinkova YV, Denisov IG, Sligar SG. 2010. Engineering extended membrane scaffold  
818 proteins for self-assembly of soluble nanoscale lipid bilayers. *Protein Engineering Design*  
819 *and Selection* **23**:843–848. doi:10.1093/protein/gzq060
- 820 Gutiérrez-Fernández J, Kaszuba K, Minhas GS, Baradaran R, Tambalo M, Gallagher DT,  
821 Sazanov LA. 2020. Key role of quinone in the mechanism of respiratory complex I.  
822 *Nature Communications* **11**:1–17. doi:10.1038/s41467-020-17957-0

- 823 Hirst J, Roessler MM. 2016. Energy conversion, redox catalysis and generation of reactive  
824 oxygen species by respiratory complex I. *BBA - Bioenergetics* **1857**:872–883.  
825 doi:10.1016/j.bbabi.2015.12.009
- 826 Holt PJ, Efremov RG, Nakamaru-Ogiso E, Sazanov LA. 2016. Reversible FMN dissociation  
827 from Escherichia coli respiratory complex I. *BBA - Bioenergetics* **1857**:1777–1785.  
828 doi:10.1016/j.bbabi.2016.08.008
- 829 Hunte C, Zickermann V, Brandt U. 2010. Functional Modules and Structural Basis of  
830 Conformational Coupling in Mitochondrial Complex I. *Science* **329**:448–451.  
831 doi:10.1126/science.1191046
- 832 Jardetzky O. 1966. Simple allosteric model for membrane pumps [27]. *Nature* **211**:969–970.  
833 doi:10.1038/211969a0
- 834 Jiang Y, Chen B, Duan C, Sun B, Yang J, Yang S. 2015. Multigene editing in the Escherichia  
835 coli genome via the CRISPR-Cas9 system. *Appl Environ Microbiol* **81**:2506–2514.  
836 doi:10.1128/AEM.04023-14
- 837 Kampjut D, Sazanov LA. 2020. The coupling mechanism of mammalian respiratory complex  
838 I. *Science* **370**:eabc4209–18. doi:10.1126/science.abc4209
- 839 Leif H, Sled VD, Ohnishi T, Weiss H, Friedrich T. 1995. Isolation and characterization of the  
840 proton-translocating NADH: ubiquinone oxidoreductase from Escherichia coli. *Eur J*  
841 *Biochem* **230**:538–548.
- 842 Lemmer C, Bouvet M, Meunier-Prest R. 2011. Proton coupled electron transfer of ubiquinone  
843 Q2 incorporated in a self-assembled monolayer. *Phys Chem Chem Phys* **13**:13327–6.  
844 doi:10.1039/c0cp02700f
- 845 Levy ED, Erba EB, Robinson CV, Teichmann SA. 2008. Assembly reflects evolution of  
846 protein complexes. *Nature* **453**:1262–1265. doi:10.1038/nature06942
- 847 Mastrorarde DN. 2005. Automated electron microscope tomography using robust prediction  
848 of specimen movements. *Journal of Structural Biology* **152**:36–51.  
849 doi:10.1016/j.jsb.2005.07.007
- 850 Morgan DJ, Sazanov LA. 2008. Three-dimensional structure of respiratory complex I from  
851 Escherichia coli in ice in the presence of nucleotides. *Biochimica et Biophysica Acta*  
852 *(BBA) - Bioenergetics* **1777**:711–718. doi:10.1016/j.bbabi.2008.03.023
- 853 Morozenko A, Stuchebrukhov AA. 2016. Dowser++, a new method of hydrating protein  
854 structures. *Proteins* **84**:1347–1357. doi:10.1002/prot.25081
- 855 Nakane T, Kimanius D, Lindahl E, Scheres SH. 2018. Characterisation of molecular motions  
856 in cryo-EM single-particle data by multi-body refinement in RELION. *eLife* **7**:1485.  
857 doi:10.7554/eLife.36861
- 858 Onsager L, Hemmer PC, Holden H. 1996. Lars Onsager 1075.
- 859 Parey K, Brandt U, Xie H, Mills DJ, Siegmund K, Vonck J, Kühlbrandt W, Zickermann V.  
860 2018. Cryo-EM structure of respiratory complex I at work. *eLife* **7**.  
861 doi:10.7554/eLife.39213
- 862 Passmore LA, Russo CJ. 2016. Specimen Preparation for High-Resolution Cryo-EM. *Meth*  
863 *Enzymol* **579**:51–86. doi:10.1016/bs.mie.2016.04.011
- 864 Rohou A, Grigorieff N. 2015. CTFFIND4: Fast and accurate defocus estimation from electron  
865 micrographs. *Journal of Structural Biology* **192**:216–221. doi:10.1016/j.jsb.2015.08.008
- 866 Sazanov LA. 2015. A giant molecular proton pump: structure and mechanism of respiratory  
867 complex I. *Nat Rev Mol Cell Biol* **16**:375–388. doi:10.1038/nrm3997
- 868 Sazanov LA. 2006. Structure of the Hydrophilic Domain of Respiratory Complex I From  
869 Thermus Thermophilus. *Science* **311**:1430–1436. doi:10.1126/science.1123809
- 870 Sazanov LA. 2003. A Role for Native Lipids in the Stabilization and Two-dimensional  
871 Crystallization of the Escherichia coli NADH-Ubiquinone Oxidoreductase (Complex I).  
872 *Journal of Biological Chemistry* **278**:19483–19491. doi:10.1074/jbc.M208959200



- 873 Schulte M, Frick K, Gnanndt E, Jurkovic S, Burschel S, Labatzke R, Aierstock K, Fiegen D,  
874 Wohlwend D, Gerhardt S, Einsle O, Friedrich T. 2019a. A mechanism to prevent  
875 production of reactive oxygen species by Escherichia coli respiratory complex I. *Nature*  
876 *Communications* **10**:2551–9. doi:10.1038/s41467-019-10429-0
- 877 Schulte M, Frick K, Gnanndt E, Jurkovic S, Burschel S, Labatzke R, Aierstock K, Fiegen D,  
878 Wohlwend D, Gerhardt S, Einsle O, Friedrich T. 2019b. A mechanism to prevent  
879 production of reactive oxygen species by Escherichia coli respiratory complex I. *Nature*  
880 *Communications* **10**:1–9. doi:10.1038/s41467-019-10429-0
- 881 Steiner J, Sazanov L. 2020. Structure and mechanism of the Mrp complex, an ancient  
882 cation/proton antiporter. *eLife* **9**:1–47. doi:10.7554/eLife.59407
- 883 Terwilliger TC, Ludtke SJ, Read RJ, Adams PD, Afonine PV. 2020. Improvement of cryo-  
884 EM maps by density modification. *Nat Meth* **17**:923–927. doi:10.1038/s41592-020-0914-  
885 9
- 886 Tropea JE, Cherry S, Waugh DS. 2009. Expression and purification of soluble His(6)-tagged  
887 TEV protease. *Methods Mol Biol* **498**:297–307. doi:10.1007/978-1-59745-196-3\_19
- 888 Verkhovskaya M, Bloch DA. 2012. Energy-converting respiratory Complex I: On the way to  
889 the molecular mechanism of the proton pump. *International Journal of Biochemistry and*  
890 *Cell Biology* **45**:1–21. doi:10.1016/j.biocel.2012.08.024
- 891 Verkhovskaya ML, Belevich N, Euro L, Wikström M, Verkhovsky MI. 2008. Real-time  
892 electron transfer in respiratory complex I. *Proceedings of the National Academy of*  
893 *Sciences* **105**:3763–3767. doi:10.1073/pnas.0711249105
- 894 Vinothkumar KR, Zhu J, Hirst J. 2014. Architecture of mammalian respiratory complex I.  
895 *Nature* **515**:80–84. doi:10.1038/nature13686
- 896 Wagner T, Merino F, Stabrin M, Moriya T, Antoni C, Apelbaum A, Hagel P, Sitsel O, Raisch  
897 T, Prumbaum D, Quentin D, Roderer D, Tacke S, Siebolds B, Schubert E, Shaikh TR,  
898 Lill P, Gatsogiannis C, Raunser S. 2019. SPHIRE-crYOLO is a fast and accurate fully  
899 automated particle picker for cryo-EM. *Communications Biology* **2**:1–13.  
900 doi:10.1038/s42003-019-0437-z
- 901 Waterhouse A, Bertoni M, Bienert S, Studer G, Tauriello G, Gumienny R, Heer FT, de Beer  
902 TAP, Rempfer C, Bordoli L, Lepore R, Schwede T. 2018. SWISS-MODEL: homology  
903 modelling of protein structures and complexes. *Nucleic Acids Research* **46**:W296–W303.  
904 doi:10.1093/nar/gky427
- 905 Williams CJ, Headd JJ, Moriarty NW, Prisant MG, Videau LL, Deis LN, Verma V, Keedy  
906 DA, Hintze BJ, Chen VB, Jain S, Lewis SM, Arendall WB, Snoeyink J, Adams PD,  
907 Lovell SC, Richardson JS, Richardson DC. 2018. MolProbity: More and better reference  
908 data for improved all-atom structure validation. *Protein Sci* **27**:293–315.  
909 doi:10.1002/pro.3330
- 910 Wirth C, Brandt U, Hunte C, Zickermann V. 2016. Structure and function of mitochondrial  
911 complex I. *BBA - Bioenergetics* **1857**:902–914. doi:10.1016/j.bbabi.2016.02.013
- 912 Yagi T, Matsuno-Yagi A. 2003. The Proton-Translocating NADH–Quinone Oxidoreductase  
913 in the Respiratory Chain: The Secret Unlocked †. *Biochemistry* **42**:2266–2274.  
914 doi:10.1021/bi027158b
- 915 Yano T, Dunham WR, Ohnishi T. 2005. Characterization of the delta muH<sup>+</sup>-sensitive  
916 ubisemiquinone species (SQ(Nf)) and the interaction with cluster N2: new insight into the  
917 energy-coupled electron transfer in complex I. *Biochemistry* **44**:1744–1754.  
918 doi:10.1021/bi048132i
- 919 Yu H, Haja DK, Schut GJ, Wu C-H, Meng X, Zhao G, Li H, Adams MWW. 2020. Structure  
920 of the respiratory MBS complex reveals iron-sulfur cluster catalyzed sulfane sulfur  
921 reduction in ancient life. *Nature Communications* **11**:1–13. doi:10.1038/s41467-020-  
922 19697-7

- 923 Yu H, Wu C-H, Schut GJ, Haja DK, Zhao G, Peters JW, Adams MWW, Li H. 2018. Structure  
924 of an Ancient Respiratory System. *Cell* **173**:1636–1649.e16.  
925 doi:10.1016/j.cell.2018.03.071
- 926 Zheng H, Chruszcz M, Lasota P, Lebioda L, Minor W. 2008. Data mining of metal ion  
927 environments present in protein structures. *Journal of Inorganic Biochemistry* **102**:1765–  
928 1776. doi:10.1016/j.jinorgbio.2008.05.006
- 929 Zheng SQ, Palovcak E, Armache J-P, Verba KA, Cheng Y, Agard DA. 2017. MotionCor2:  
930 anisotropic correction of beam-induced motion for improved cryo-electron microscopy.  
931 *Nature Publishing Group* **14**:331–332. doi:10.1038/nmeth.4193
- 932 Zhu J, Vinothkumar KR, Hirst J. 2016. Structure of mammalian respiratory complex I. *Nature*  
933 **536**:1–17. doi:10.1038/nature19095
- 934 Zivanov J, Nakane T, Forsberg BO, Kimanius D, Hagen WJH, Lindahl E, Scheres SHW.  
935 2018. New tools for automated high-resolution cryo-EM structure determination in  
936 RELION-3. *eLife* **7**:163. doi:10.7554/eLife.42166
- 937 Zivanov J, Nakane T, Scheres SHW. 2020. Estimation of high-order aberrations and  
938 anisotropic magnification from cryo-EM data sets in RELION-3.1. *IUCrJ* **7**:253–267.  
939 doi:10.1107/S2052252520000081
- 940 Zu Y, Di Bernardo S, Yagi T, Biochemistry JH, 2002. 2002. Redox properties of the [2Fe-2S]  
941 center in the 24 kDa (NQO2) subunit of NADH: ubiquinone oxidoreductase (complex I).  
942 *ACS Publications*  
943 **41**:10056–10069. doi:10.1021/bi026026f
- 944

945 Figures

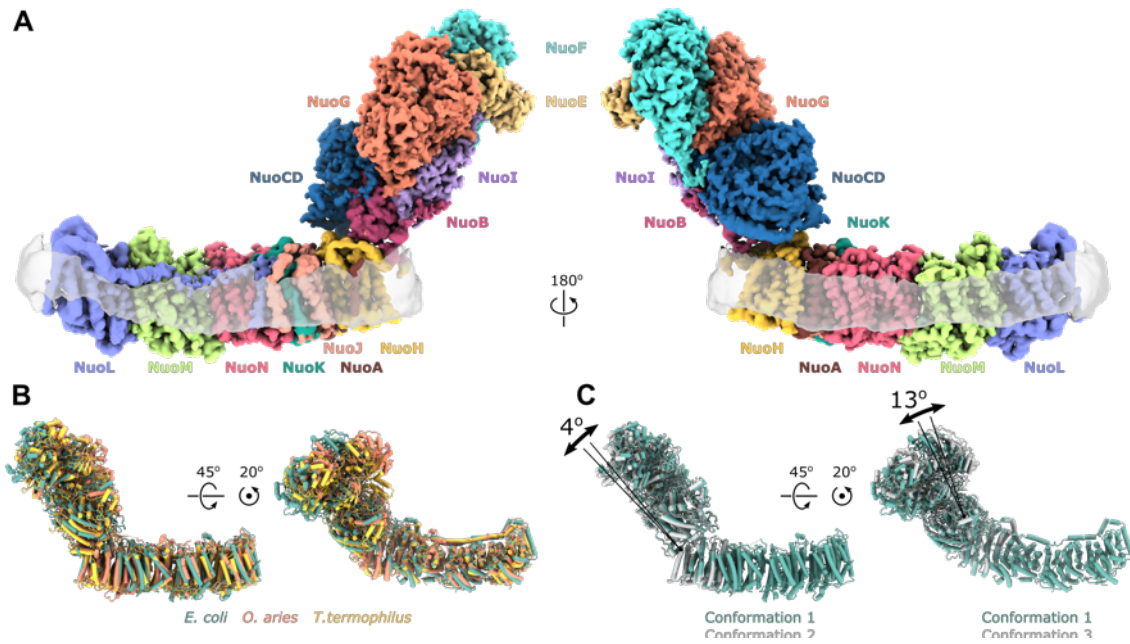

946

947

948

949

950

951

952

953

954

**Figure 1 Architecture of *Escherichia coli* respiratory complex I.** (A) Segmented density map of the complete complex I shown together with the nanodisc density. (B) Comparison of the structures of the *E. coli* (green), *Thermus thermophilus* (PDB ID: 4HEA, yellow), and the core subunits of ovine (PDB ID: 6ZKD, orange) complex I. (C) Conformational differences between three conformations resolved at high resolution. The structures are aligned on the membrane arm. The rotation axes and angles are indicated.

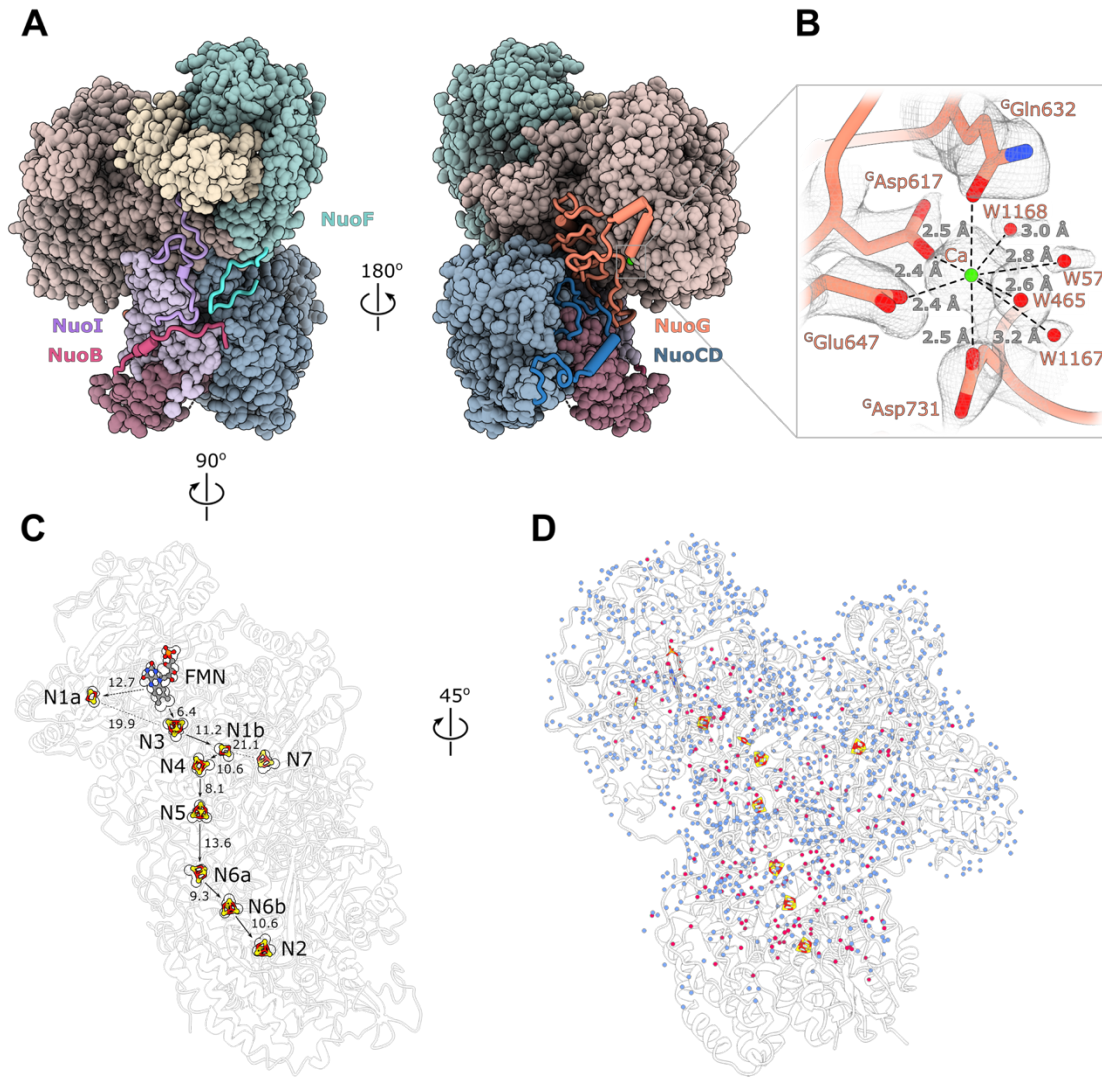

955

956 **Figure 2 Structure of the peripheral arm.** (A, B) The *Escherichia coli*-specific extensions  
 957 in the peripheral arm subunits: (A) C-termini of NuoI (violet), NuoB (pink), NuoF  
 958 (turquoise), (B) NuoG insertion (orange), and NuoCD linker (blue). (C) Structural details of  
 959 the calcium-binding site. (D) Comparison of the FMN and Fe-S clusters positions in *E. coli*  
 960 (shown as atoms) and *Thermus thermophilus* (shown as outline around *E. coli* atoms). Edge-  
 961 to-edge distances and the electron pathway are indicated. (E) Water molecules modelled into  
 962 the 2.1 Å resolution density of the peripheral arm are shown in blue. Water molecules  
 963 conserved with the peripheral arm of ovine complex I (PDB ID: 6ZK9, red) are shown as red  
 964 spheres. FMN and iron-sulfur (Fe-S) clusters are shown as spheres.

965

966

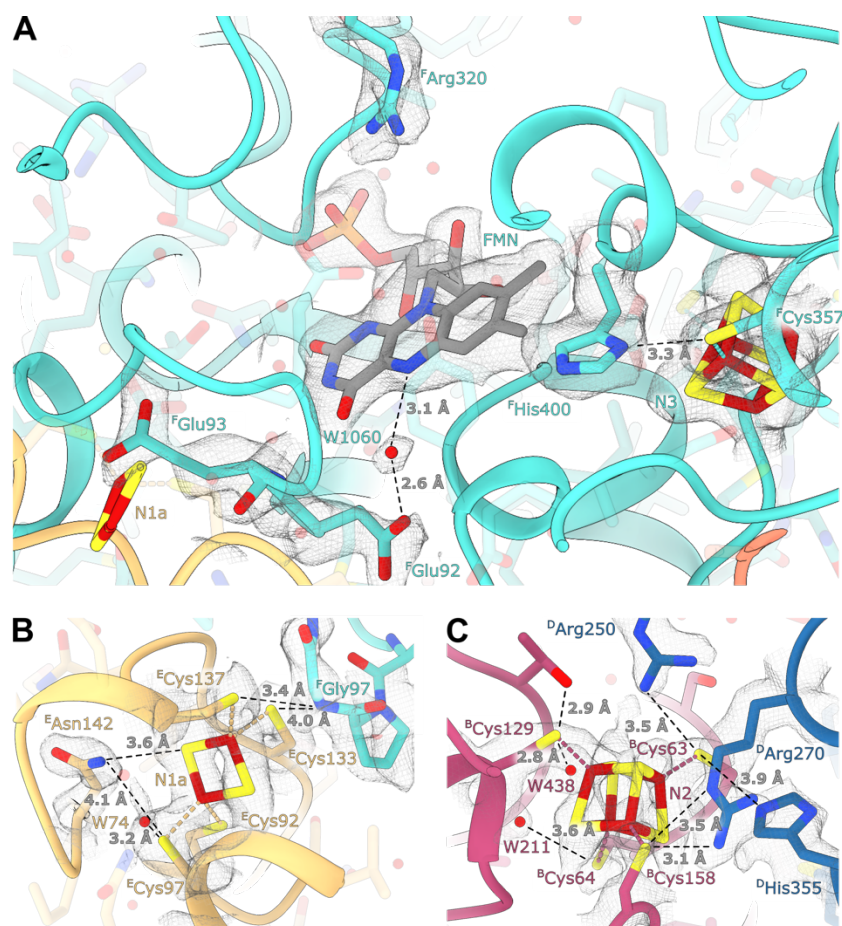

967

968 **Figure 3 Details of the electron transport chain. (A)** The NADH-binding pocket and  
969 environment of the Fe-S cluster N3. (B, C) Environment of the Fe-S clusters N1a and N2.  
970  
971

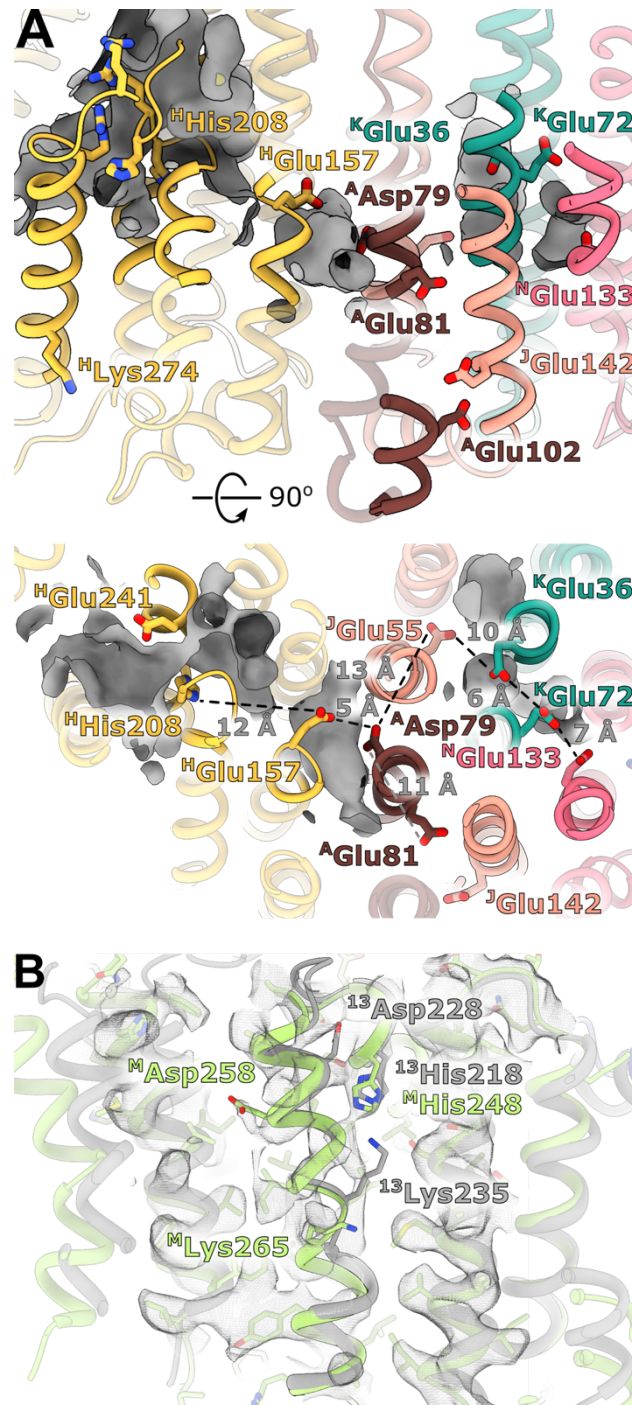

972  
973  
974  
975  
976  
977  
978  
979  
980

**Figure 4 Structural details of the membrane arm.** (A) The E-channel. Top: Side view, bottom: view from the cytoplasm. Charged residues between NuoH and NuoN subunits are indicated as along with the distances between them. The cavities allowing entrance of ions and water molecules are shown as grey surfaces. (B) Conformational heterogeneity within the NuoM subunit. The *E. coli* structure and amino acids are green-colored, whereas the aligned structure of *T. thermophilus* is grey. The *E. coli* membrane arm density is depicted.

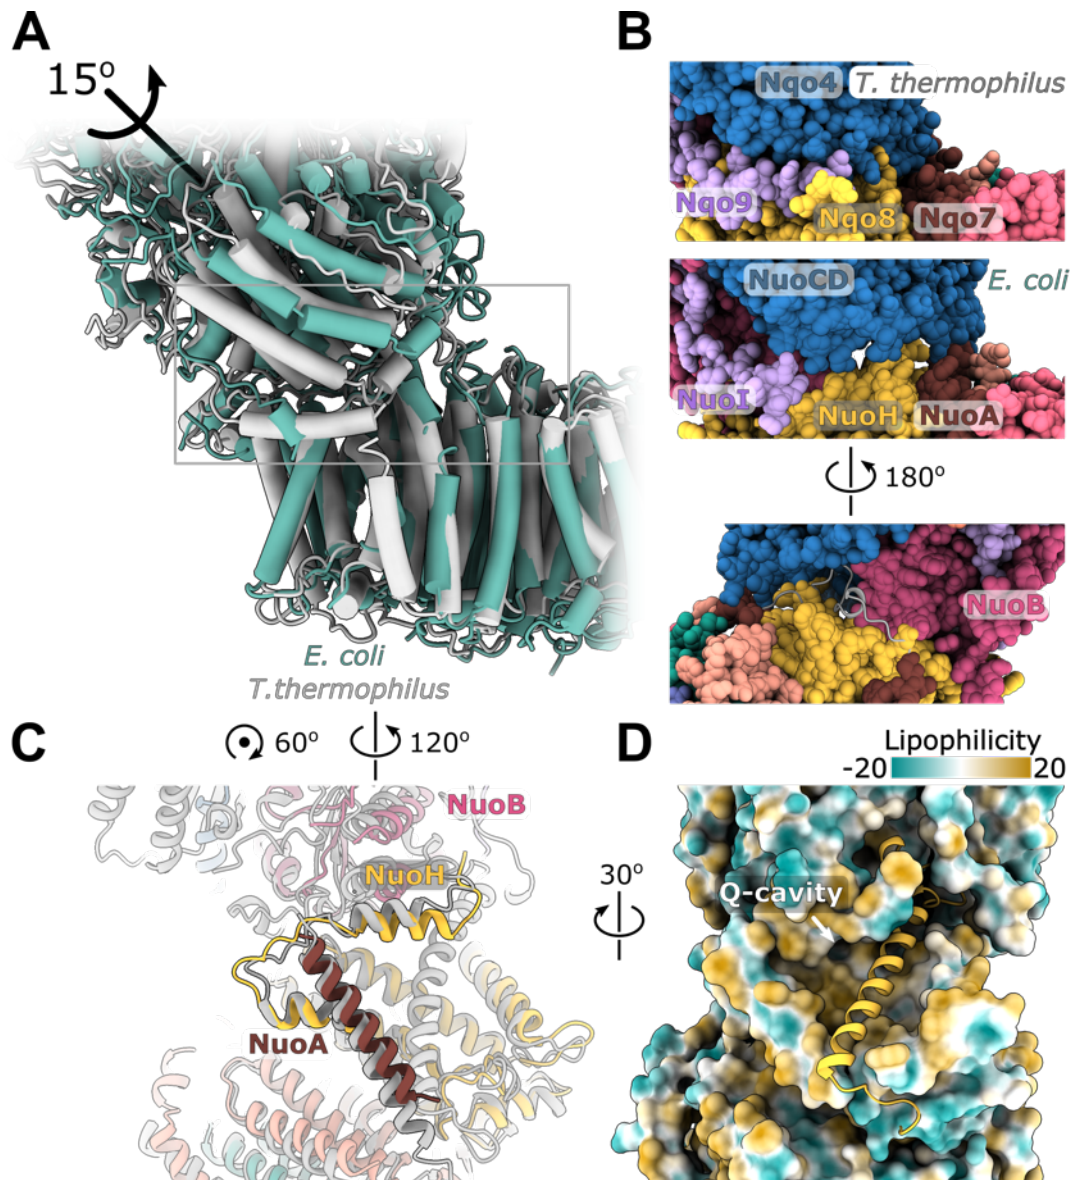

981  
982  
983  
984  
985  
986  
987  
988  
989  
990  
991  
992  
993  
994  
995  
996

**Figure 5 Interface between the peripheral and membrane arms.** (A) Comparison of the interface between *E. coli* (green) and *T. thermophilus* (PDB ID:4HEA, grey) complex I. Structures were aligned on the subunit NuoH/Nqo8. The rotation axis of the subunits NuoB/D module relative to Nqo6/4 is indicated. (B) Interfacial contacts between the peripheral and membrane arms in *T. thermophilus* (upper panel) and *E. coli* (middle and bottom panel). A gap in the subunit interface is apparent in the absence of the conserved <sup>A</sup>TMH1-2 loop fragment. The corresponding loop from *T. thermophilus* is shown in grey in the cartoon representation (bottom panel). (C) Differences in the structures of NuoH and NuoA subunits between *E. coli* (colour coded as in Figure 1) and *T. thermophilus* (grey). (D) View from the membrane on the entrance to the Q-cavity. Homology model of <sup>H</sup>TM1, absent in the *E. coli* structure, is shown in the cartoon representation. The protein surface is coloured by lipophilicity.

997

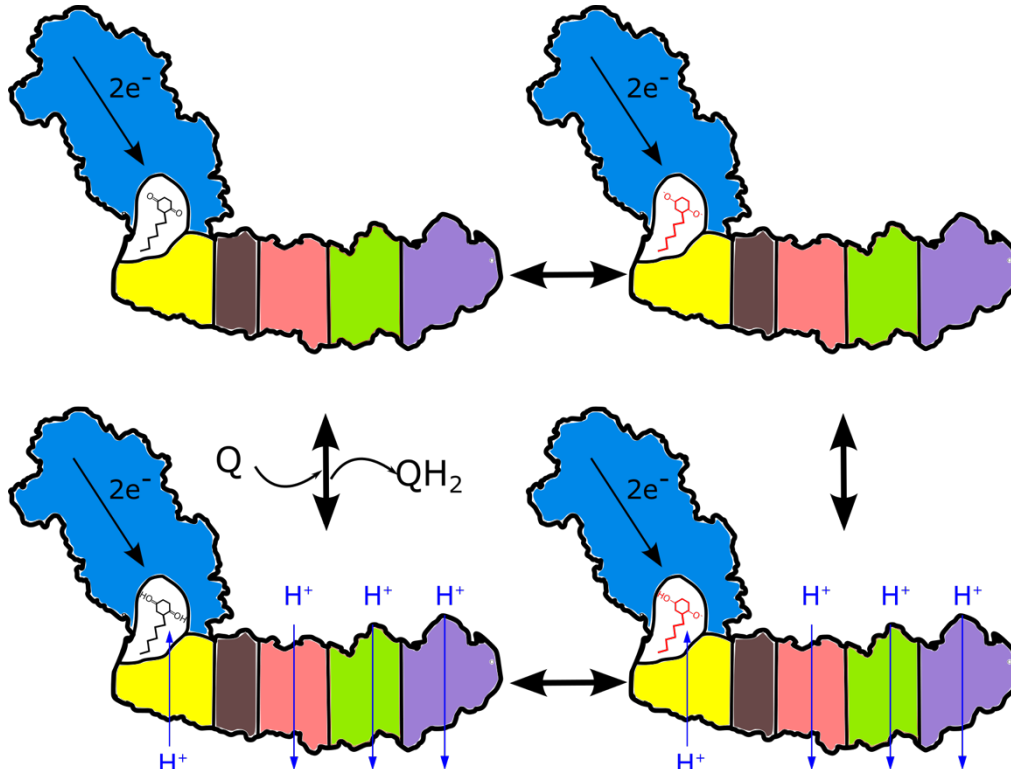

998

999

1000

1001

1002

1003

1004

1005

1006

**Figure 6** Proposed mechanism of coupling in respiratory complex I. Ubiquinone reduction decreases the proton potential in the Q-cavity, generating/enhancing electrochemical potential between the Q-cavity and periplasmic space. It is subsequently neutralized by protons translocated through NuoH from the periplasm into the Q-cavity and this translocation is coupled with the reversible translocation of three protons into the periplasm. Colour coding of schematic subunits in the membrane arm is similar to that described in Figure 1, negatively charged states of ubiquinone are shown in red.



1007

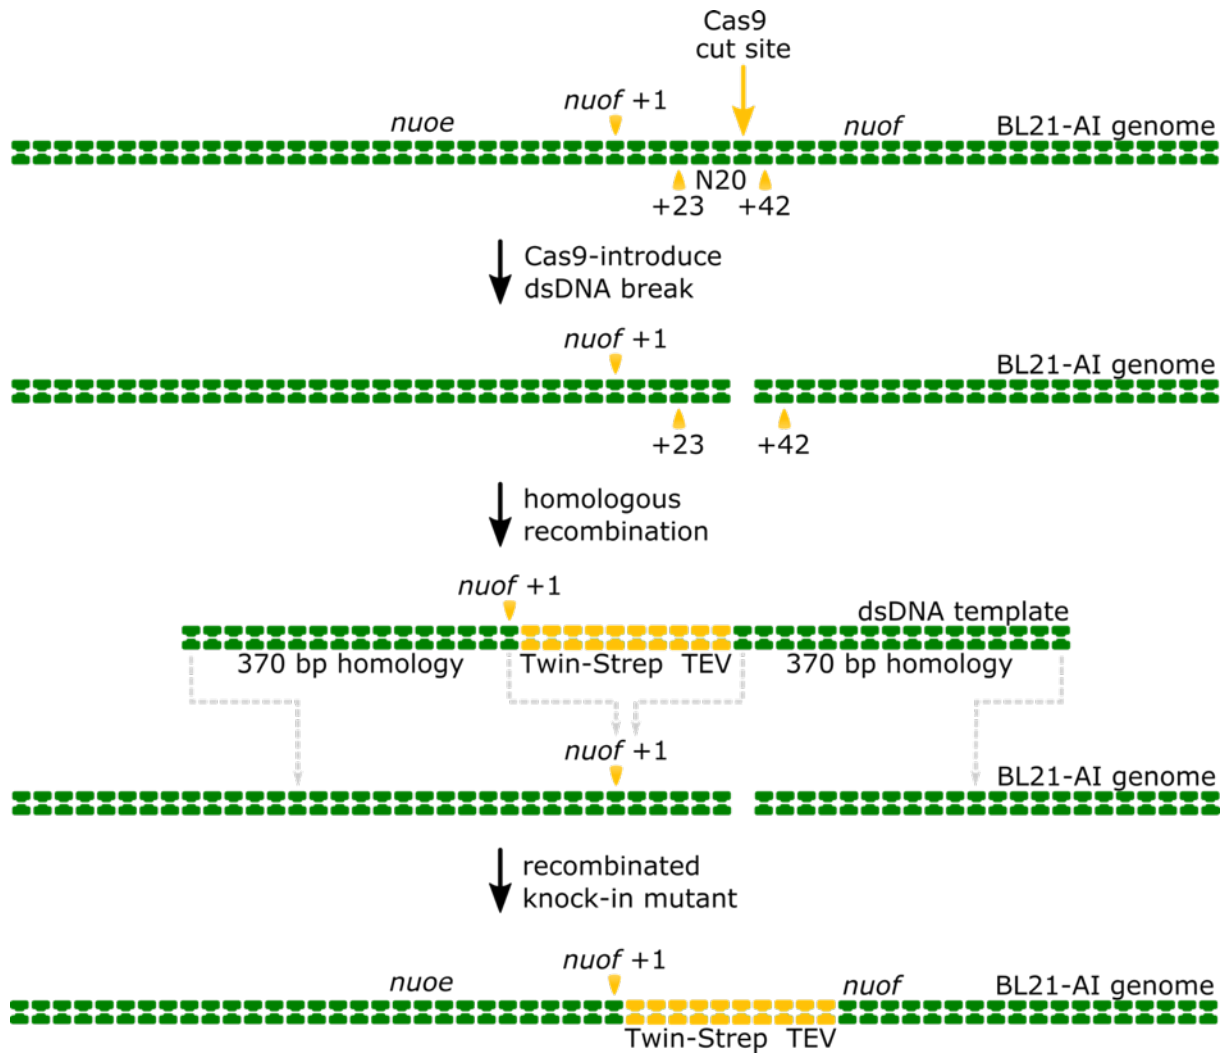

1008

1009

1010

1011

1012

1013

1014

1015

1016

1017

**Figure 1 - figure supplement 1 Schematic representation of Crispr-Cas9-enabled incorporation of the twin-strep tag into the N-terminus of the genomically-encoded NuoF subunit.** The Cas9 enzyme introduces a double-stranded DNA (dsDNA) break into the *nuof* locus within the *E. coli* BL21-AI genome at the 20-nucleotide target sequence (N20), located 23 base-pairs (bp) downstream of the *nuof* +1 site. Subsequently, the  $\lambda$ -Red mediated homologous DNA recombination incorporates the supplied dsDNA template comprising the knock-in cassette flanked by 370 bp long homologous regions into the genome. The recombination results in insertion of sequences coding for the Twin-Strep tag and TEV protease recognition site right after the *nuof* transcription start site.

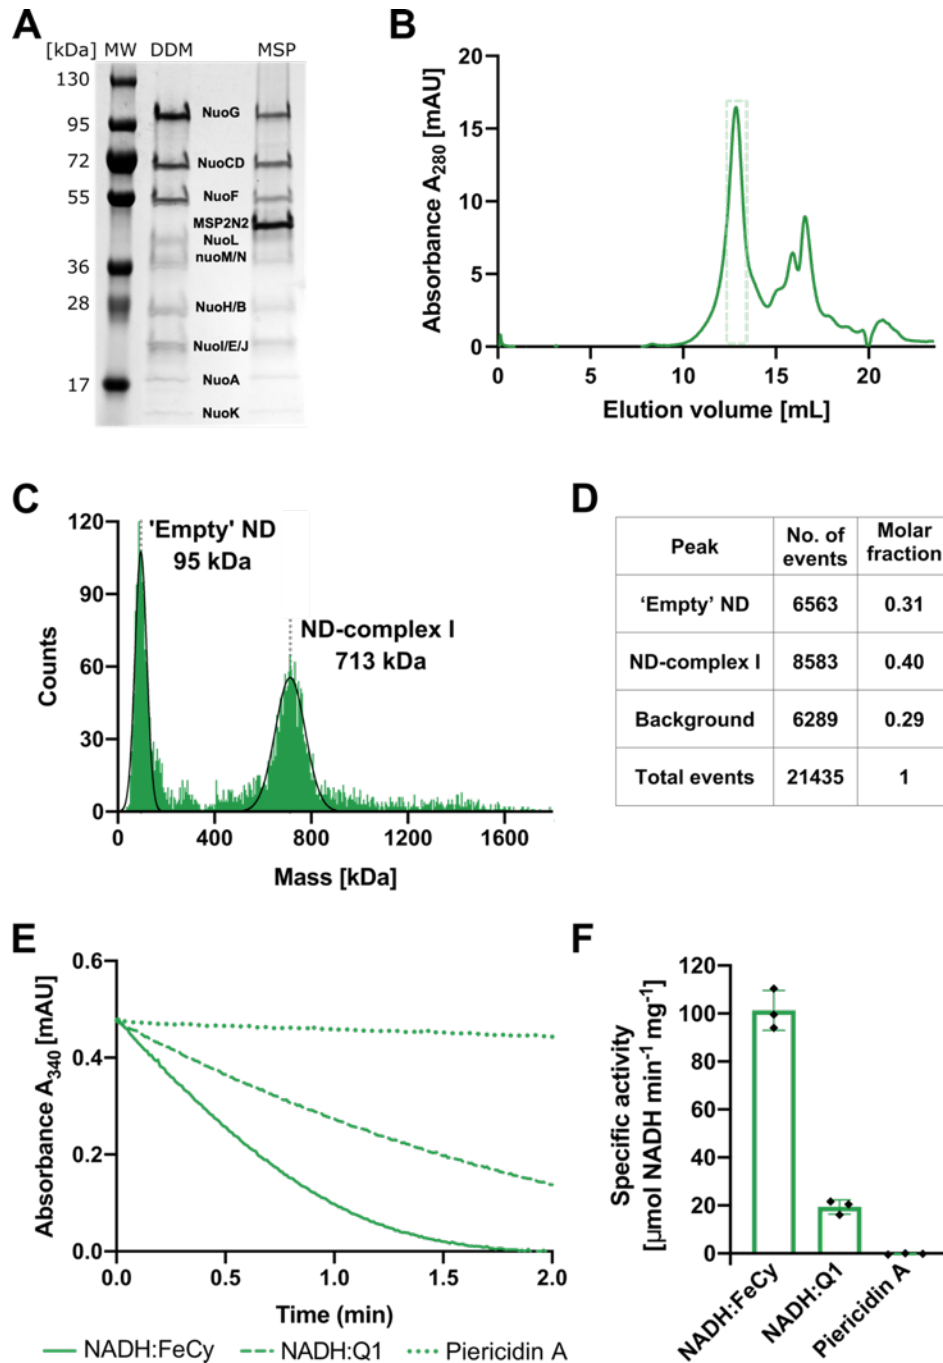

1018

1019 **Figure 1 - figure supplement 2 Purification and biochemical characterization of *E. coli* complex I**  
 1020 **reconstituted into lipid nanodiscs.** (A) SDS-PAGE depicting the sample solubilized in detergent after affinity  
 1021 chromatography (DDM) and the sample reconstituted into lipid nanodiscs after size-exclusion chromatography  
 1022 (ND). (B) Size-exclusion chromatography profile after complex I reconstitution into lipid nanodiscs. The main  
 1023 peak at 13 mL consists mostly of the intact reconstituted complex I. Fractions marked by the green, dashed-  
 1024 rectangle were pooled, concentrated, and used for cryo-EM and activity assays. The second peak (retention volume  
 1025 15 ml and higher) contains empty nanodiscs and the dissociated cytoplasmic arm. (C,D) Mass photometry of the  
 1026 reconstituted complex I pooled from the main gel filtration peak. (C) The representative mass histogram, showing  
 1027 two main peaks: 'Empty' nanodiscs at 95 kDa and the nanodisc-reconstituted complex I at 713 kDa. (D) Molar  
 1028 fractions of components identified in the histogram C. (E) Representative traces of the spectrophotometric activity  
 1029 assays: NADH:FeCy (solid line), NADH:Q1 (dashed line), and NADH:Q1 in the presence of 20  $\mu$ M Piericidin A  
 1030 (dotted line). The concentration of complex I was 2.5 times lower for NADH:FeCy compared to that for the  
 1031 NADH:Q1 assay. (F) Values of  $V_{max}$  for the three assay conditions described in panel (E). The graph shows mean  
 1032  $\pm$  SD, n=3. Individual measurement results are indicated as diamonds.

1033

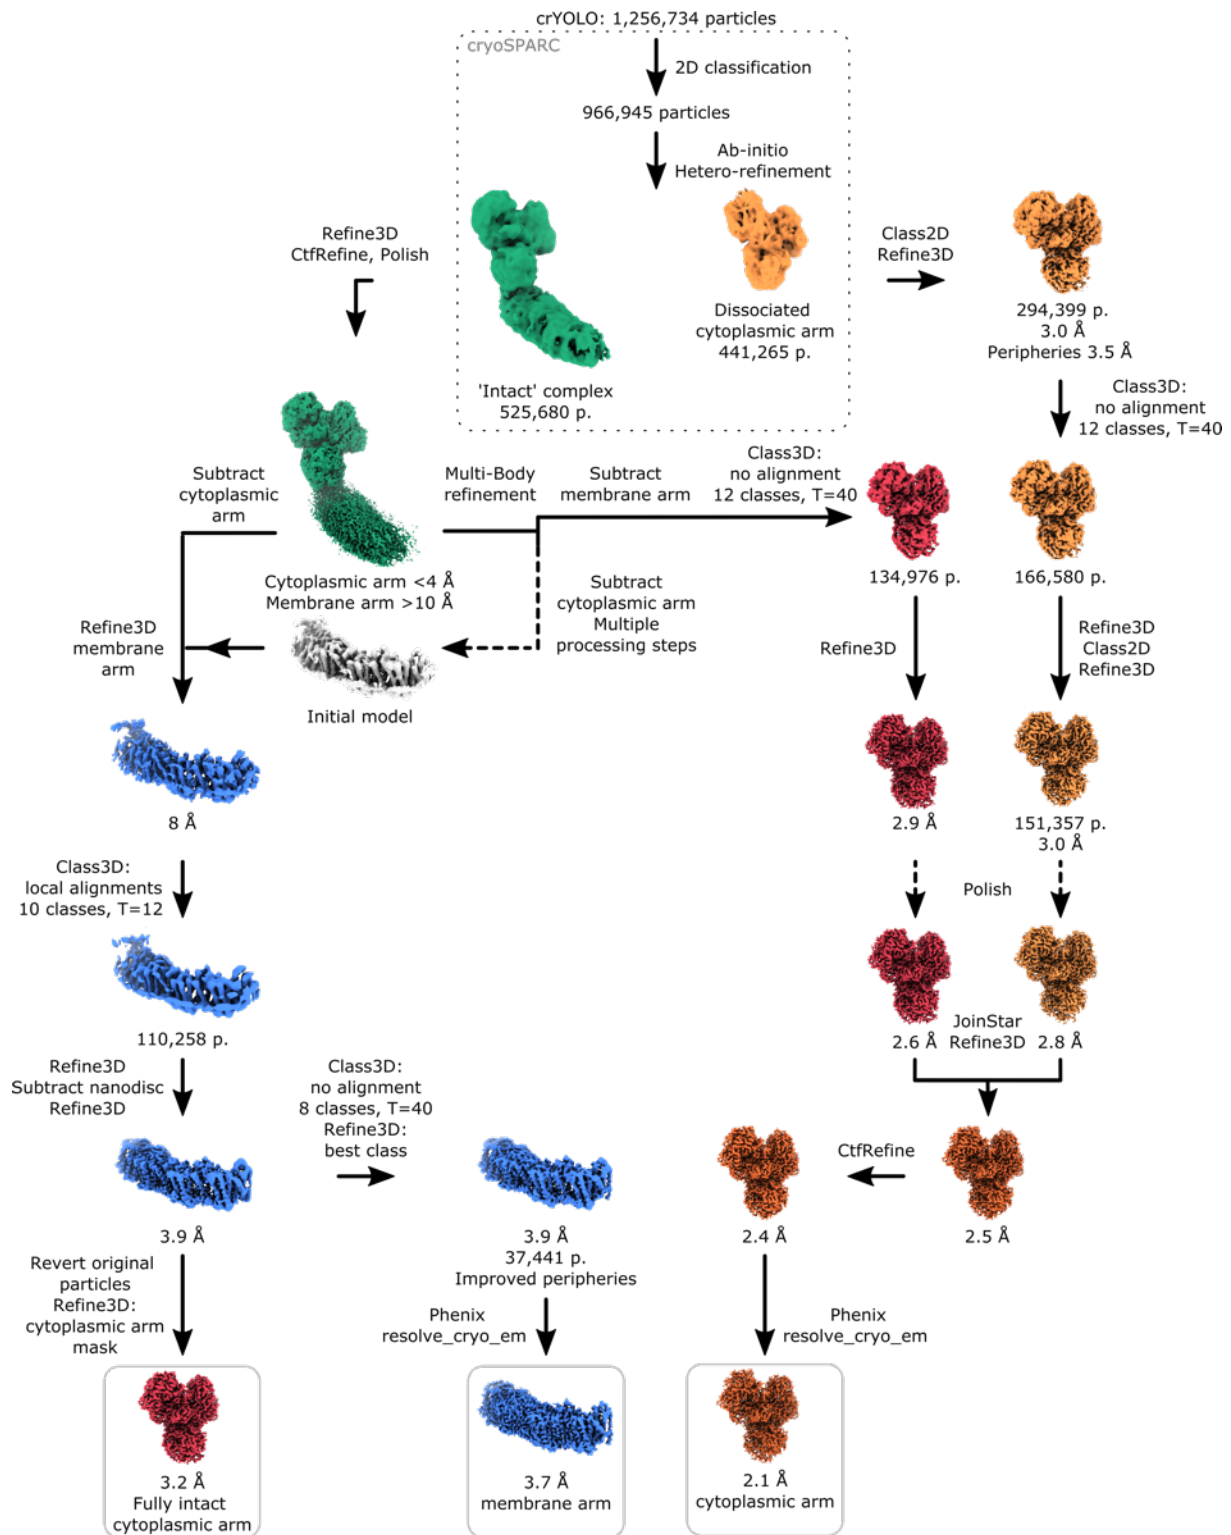

**Figure 1 - figure supplement 3 Image processing diagram.** The scheme indicates the principal steps during image processing that resulted in reconstructions of the peripheral and membrane arms.

1034  
 1035  
 1036  
 1037

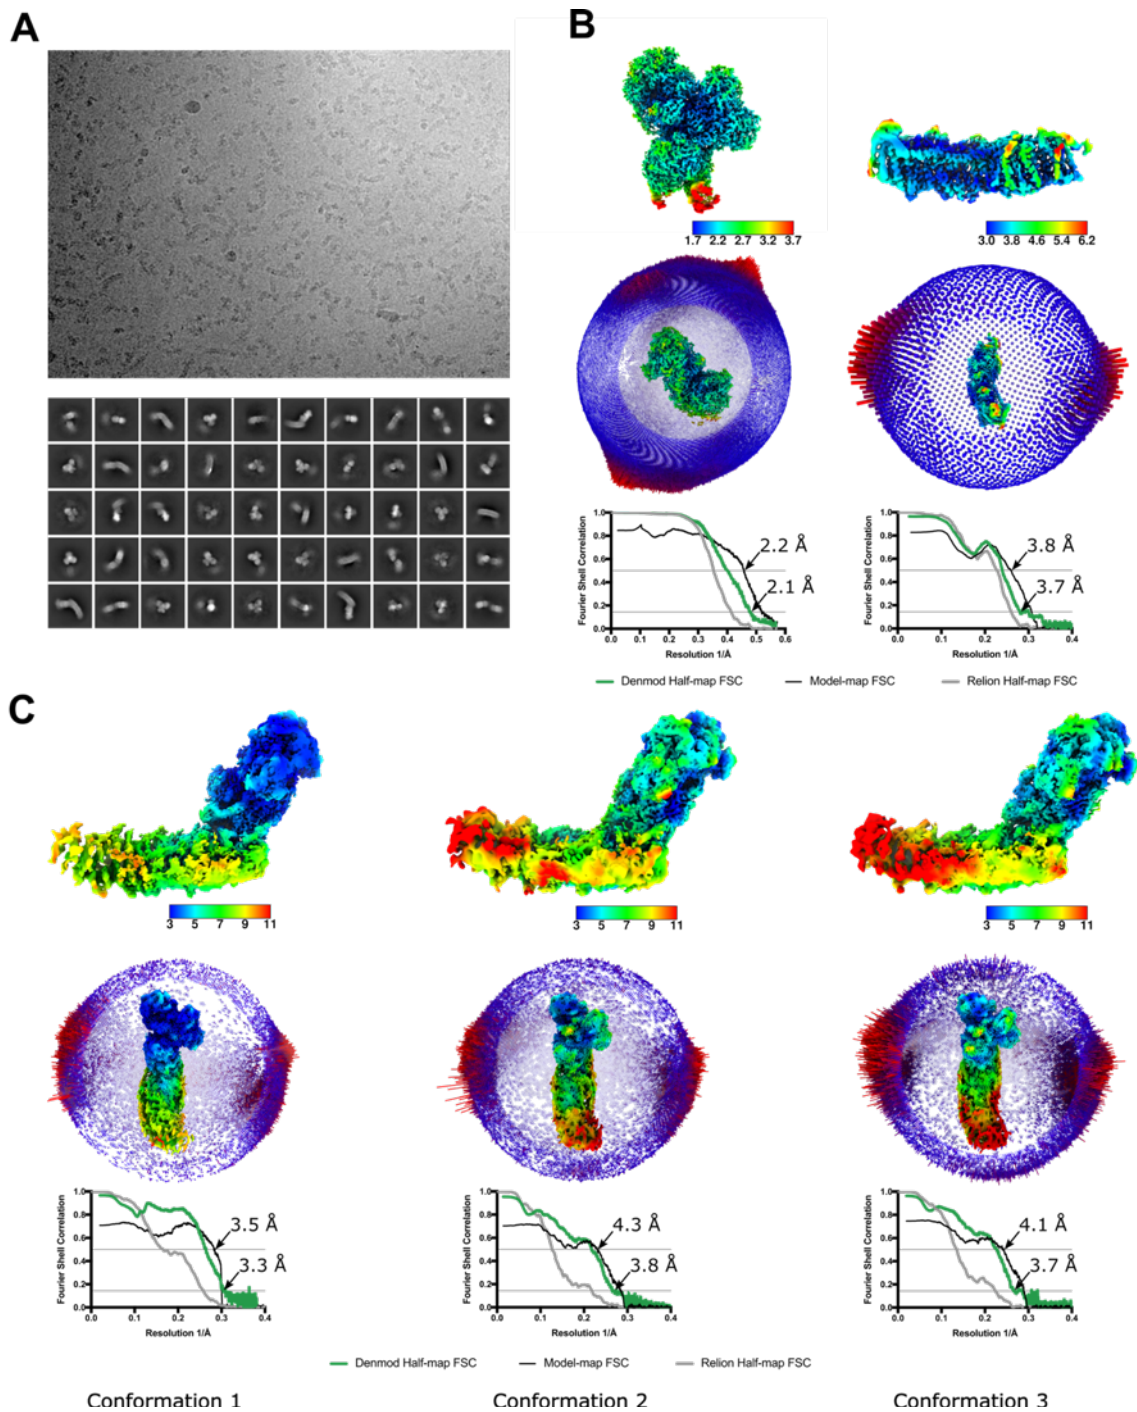

1038  
1039  
1040  
1041  
1042  
1043  
1044

**Figure 1 - figure supplement 4 Properties of the cryo-EM sample and the final reconstructions.** (A) A representative micrograph (top) and 2D classes of the entire complex I (bottom). (B,C) Local resolution maps, angular distribution, and FSC plots for reconstructions of the cytoplasmic (B, left) and membrane (B, right) arms as well as for the three conformations of the intact complex I (C).

1045

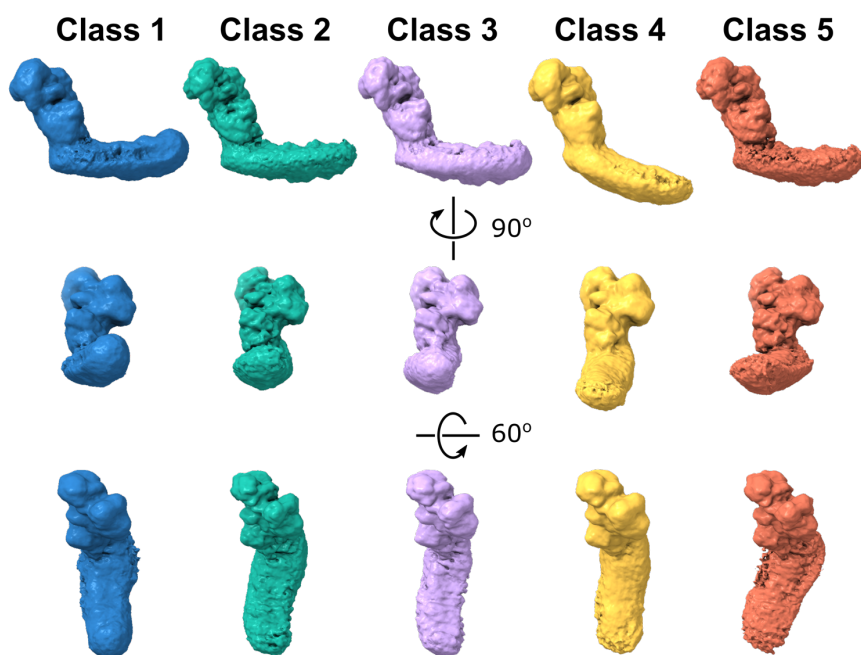

1046  
1047  
1048  
1049  
1050  
1051  
1052

**Figure 1 - figure supplement 5 Dynamic connection between peripheral and membrane arms.** Representative 3D classes show flexibility between the arms in the *E. coli* complex. The conformations were obtained by 3D classification of all intact complex I particles aligned to the peripheral arm.

1053

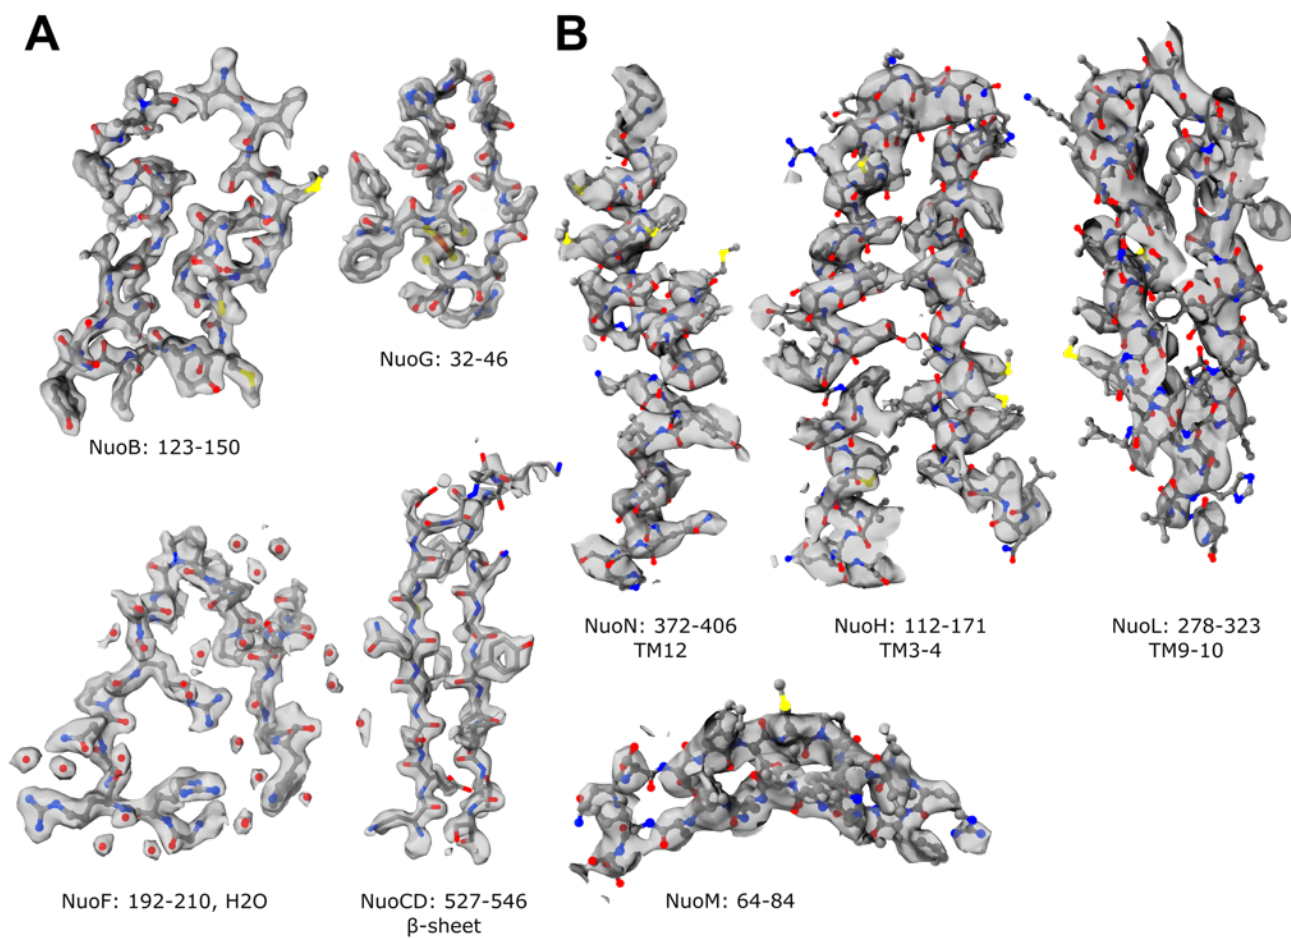

1054  
1055  
1056  
1057  
1058  
1059  
1060  
1061

**Figure 1 - figure supplement 6 Representative cryo-EM map densities.** Examples of density maps for the reconstructions of the (A) cytoplasmic and (B) membrane arm.

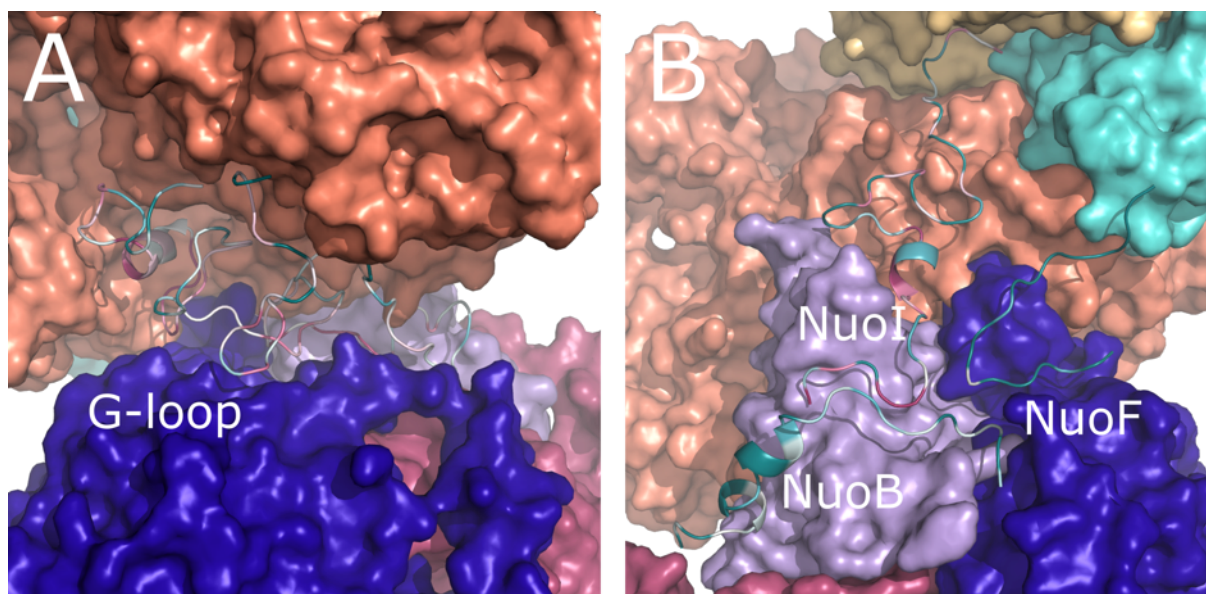

1062  
1063  
1064  
1065  
1066  
1067  
1068

**Figure 2 - figure supplement 1 Conservation of *E. coli*-specific tails in the peripheral arm subunits. (A)** Insertion into subunit NuoG, the G-loop. (B) C-terminal tails in subunits NuoF, NuoI and NuoB. Color coding of the subunits is the same as in Figure 1. Conservation was calculated using ConSurf server and is color coded from green to white to purple as the degree of conservation increases.

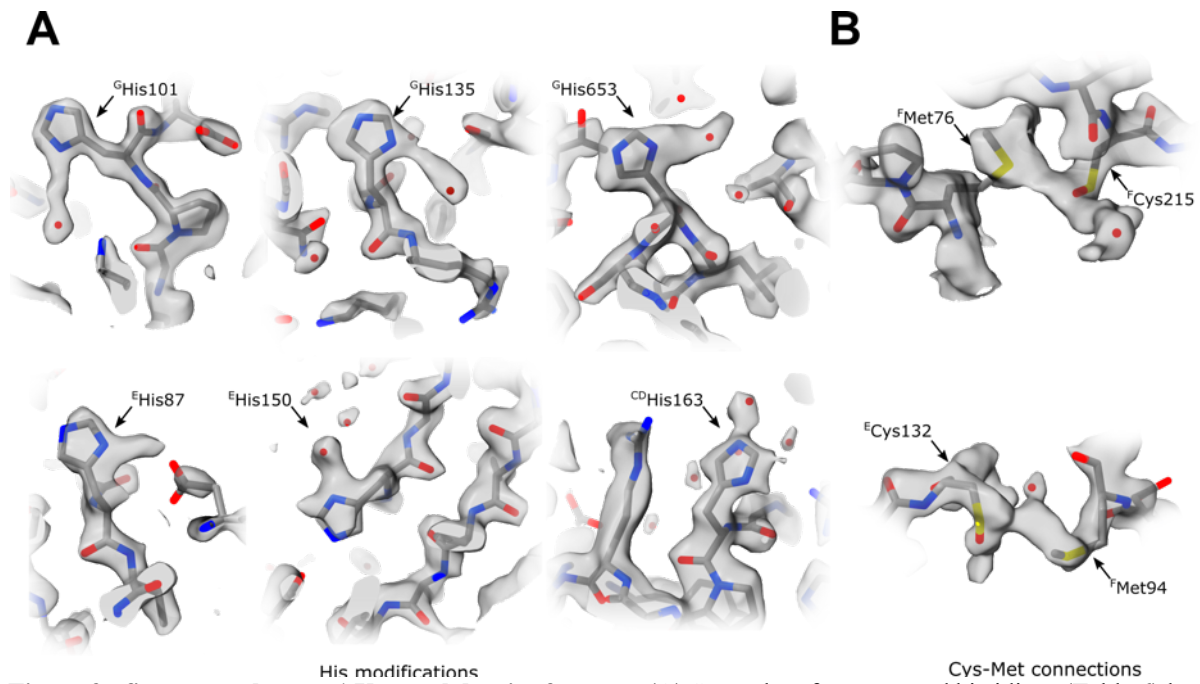

1069  
1070  
1071  
1072  
1073  
1074  
1075  
1076  
1077  
1078  
1079  
1080  
1081

**Figure 3 - figure supplement 1 Unusual density features.** (A) Several surface-exposed histidines (Table 6) have extended density protruding from the imidazole ring in the plane of the ring. These extensions may represent a tightly bound heavy atom, but these features are heterogeneous (length between 2 and 4 Å) and have a very heterogeneous chemical environment; therefore, they cannot be attributed to a single type of bound atom or modification. We tentatively modelled them as water molecules. (B) In three locations, density bridging sulfur atoms of surface-exposed and closely positioned cysteine-methionine couples are bridged by density with reproducible elongated features (Cys-Met: <sup>F</sup>Met76-<sup>F</sup>Cys215, <sup>F</sup>Met94-<sup>F</sup>Cys132, <sup>B</sup>Met106-<sup>B</sup>Cys102). We could not assign the density to any known modification or tightly bound chemical present in the protein purification buffer. Because complex I was purified without reducing agents, the corresponding Cys residues were tentatively modelled as cysteines oxidized to sulfenic acid.



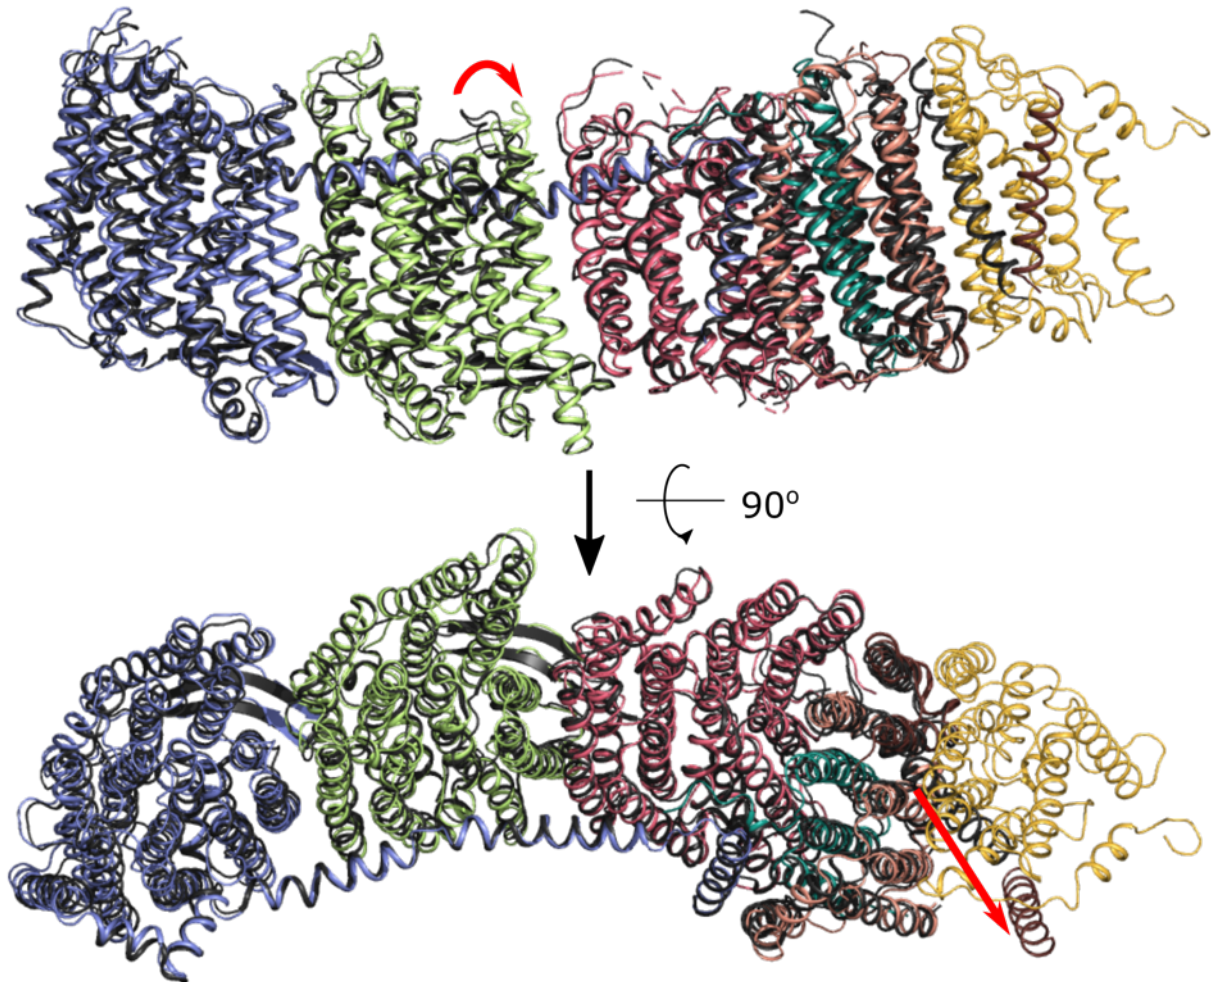

1082  
1083  
1084  
1085  
1086  
1087  
1088

**Figure 4 - figure supplement 1 Comparison of X-ray and cryo-EM structures of the membrane domain.** The cryo-EM structure is colored as in Figure 1, the X-ray model is shown in black. Significant shifts in the cytoplasmic loop of NuoM and the shift of <sup>A</sup>TM1 are indicated with red arrows. Part of the  $\beta$ -hairpin observed in the crystal structure forms an extension of <sup>M</sup>TM6a in the cryo-EM structure. This happens despite this loop not being involved in direct crystal contact.

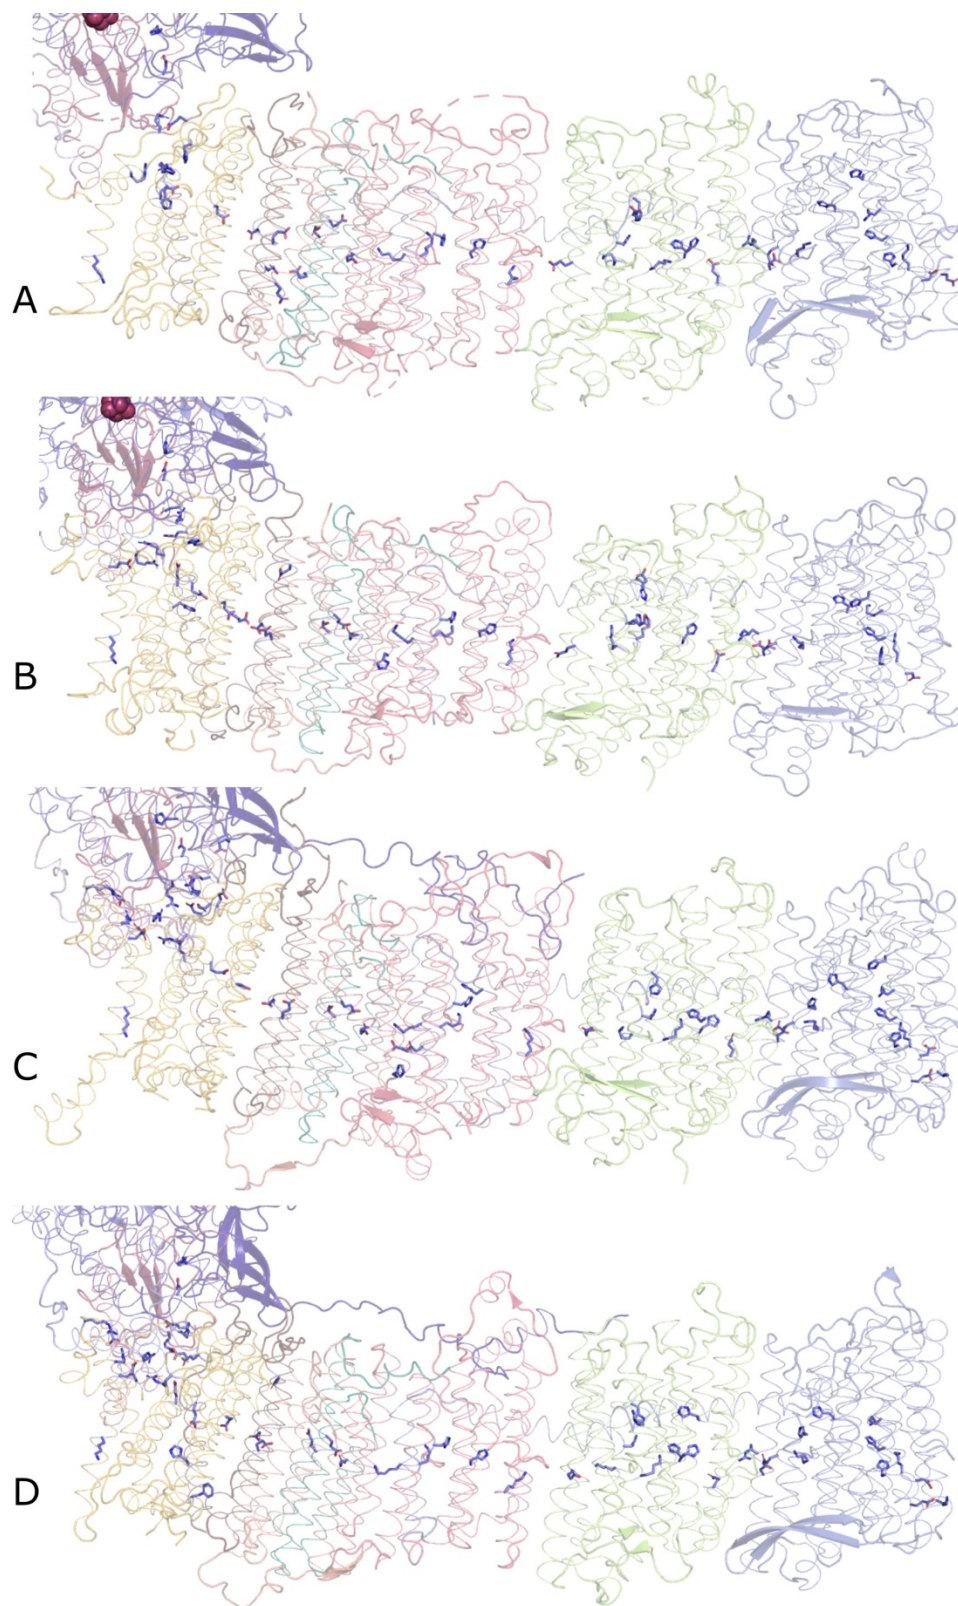

1089  
1090 **Figure 4 - figure supplement 2 Conserved chain of ionizable residues.** Comparison of the chains of ionizable  
1091 residues lining the Q-cavity and positioned in the hydrophobic region of the lipid membrane in (A) *E. coli*, (B) *T.*  
1092 *thermophilus*, (C) *Yarrowia lipolytica*, and (D) *Ovis aries* complex I. In C and D, only the core subunits are shown.  
1093  
1094

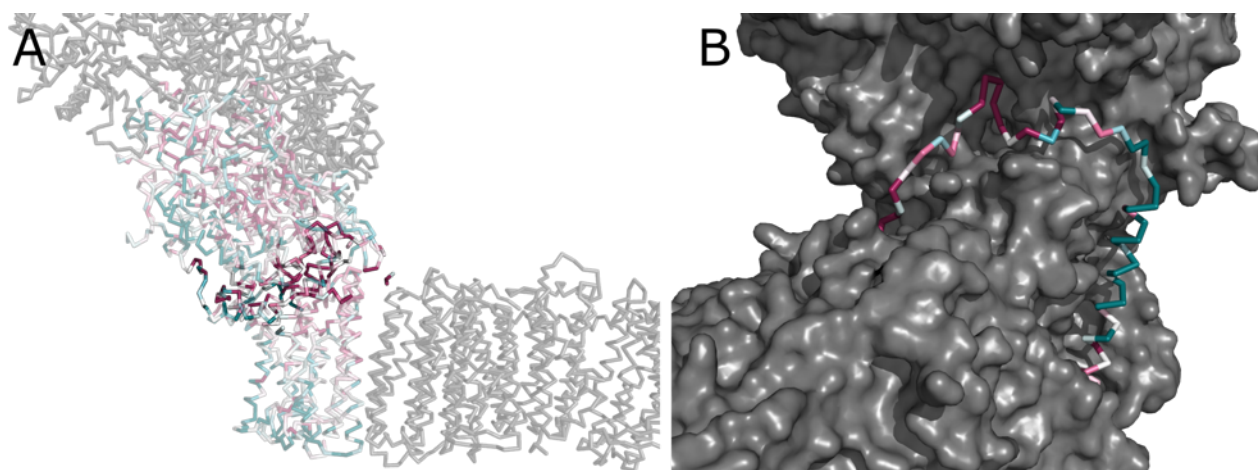

1095  
1096  
1097  
1098  
1099  
1100  
1101  
1102  
1103  
1104

**Figure 5 - figure supplement 1 Conserved interface between the arms.** (A) Conservation of subunits contributing to the interface between the peripheral and membrane arms, calculated in ConSurf and color-coded from green to white to purple as the degree of conservation increases. Residues directly contributing to the interaction between arms are highlighted. (B) The conserved region of the NuoA TMH1-TMH2 loop forms a plug, which fills a crevice between the subunits NuoD, NuoB, and NuoH.

1105

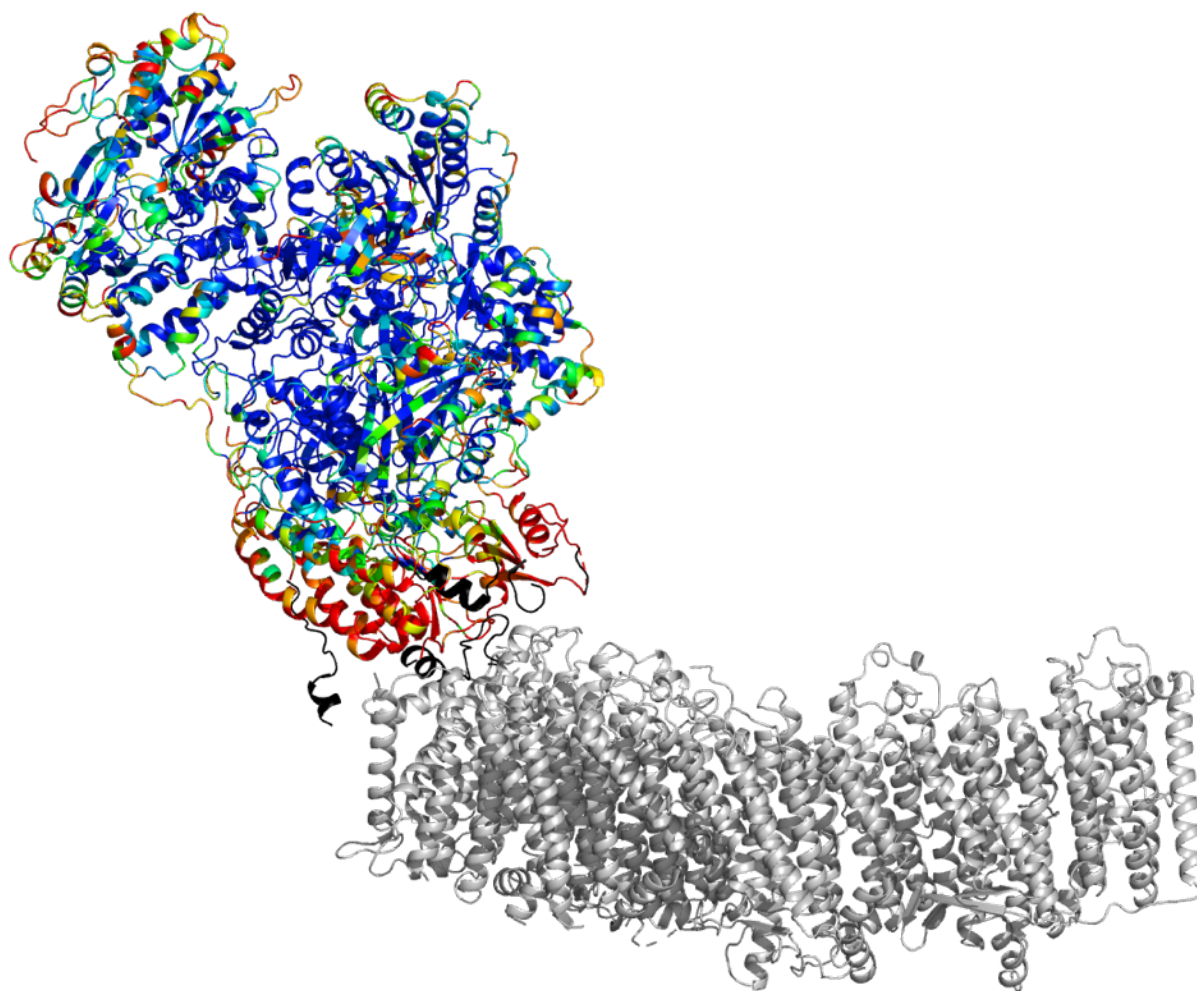

1106

1107

**Figure 5 - figure supplement 2 B-factors of the peripheral arm show higher mobility at the arms interface.**

1108

The cartoon representation is shown. The peripheral arm is colored by B-factors. The rainbow color palette scales from 5 Å<sup>2</sup> - blue to 100 Å<sup>2</sup>- red. Regions completely disordered in the map of focused reconstruction of the peripheral arm but showing density in in the reconstructions of the intact complex are colored in black. The membrane arm is shown in grey for reference.

1109

1110

1111

1112

1113

1114

1115

1116

1117

1118

1119

1120

**Movie 1** Composite density map of *E. coli* complex I is shown along with density of the lipid nanodisc. The homology model of TMH1 is shown in ribbon representation.

1121

1122

1123

**Movie 2** The fragmented density of the NuoM TM8 is surrounded by well-resolved TMHs.

1124

1125 **Table 1** Statistics of cryo-EM data collection, data processing, and model refinement  
1126

| <b>Data collection</b>                                |                                      |                |                |                 |                    |
|-------------------------------------------------------|--------------------------------------|----------------|----------------|-----------------|--------------------|
| Microscope                                            | JEOL CRYOARM300                      |                |                |                 |                    |
| Acceleration voltage [kV]                             | 300                                  |                |                |                 |                    |
| Energy filter                                         | In-column Omega energy filter        |                |                |                 |                    |
| Energy filter slit width [eV]                         | 20                                   |                |                |                 |                    |
| Magnification                                         | 60 000 x                             |                |                |                 |                    |
| Detector                                              | Gatan K3                             |                |                |                 |                    |
| Physical pixel size [Å]                               | 0.771                                |                |                |                 |                    |
| Exposure time [s]                                     | 3                                    |                |                |                 |                    |
| Number of frames                                      | 61                                   |                |                |                 |                    |
| Total electron dose [e <sup>-</sup> /Å <sup>2</sup> ] | 65                                   |                |                |                 |                    |
| Defocus range [μm]                                    | 0.9 - 2.2                            |                |                |                 |                    |
| Number of micrographs collected                       | 9,122                                |                |                |                 |                    |
| Total number of particles extracted                   | 1,256,734                            |                |                |                 |                    |
| <b>Data processing</b>                                |                                      |                |                |                 |                    |
|                                                       | Entire complex                       |                |                | Membrane domain | Cytoplasmic domain |
|                                                       | Conformation 1                       | Conformation 2 | Conformation 3 |                 |                    |
| PDB ID:                                               | 7NYR                                 | 7NYU           | 7NYV           | 7NYH            | 7NZ1               |
| EMDB ID:                                              | EMD-12653                            | EMD-12654      | EMD-12655      | EMD-12652       | EMD-12661          |
| Imposed symmetry                                      | C1                                   | C1             | C1             | C1              | C1                 |
| Final number of particles                             | 23,445                               | 21,620         | 21,234         | 37,441          | 286,384            |
| Final resolution, RELION, FSC=0.143                   | 3.9                                  | 4.6            | 4.5            | 3.9             | 2.4                |
| Final resolution, RELION, FSC=0.5                     | 6.0                                  | 7.9            | 7.4            | 4.4             | 2.8                |
| Sharpening B-factor, RELION [Å <sup>2</sup> ]         | -67                                  | -126           | -116           | -70             | -52                |
| Final resolution, PHENIX resolve_cryo_em, FSC=0.143   | 3.3                                  | 3.8            | 3.7            | 3.7             | 2.1                |
| Final resolution, PHENIX resolve_cryo_em, FSC=0.5     | 3.8                                  | 4.6            | 4.4            | 4.2             | 2.5                |
| Local resolution range (Å)                            | 2.9-11                               | 3.2-15         | 3.1-13         | 3.0-6.2         | 1.8-3.8            |
| <b>Model refinement</b>                               |                                      |                |                |                 |                    |
| Initial model                                         | 4HEA, 3RKO                           | 4HEA, 3RKO     | 4HEA, 3RKO     | 4HEA, 3RKO      | 4HEA               |
| Refinement package                                    | PHENIX 1.18.2, Real-space refinement |                |                |                 |                    |
| Model resolution at FSC=0.5 (Å)                       | 3.5                                  | 4.3            | 4.1            | 3.8             | 2.2                |
| Cross-correlation                                     |                                      |                |                |                 |                    |
| Mask                                                  | 0.68                                 | 0.58           | 0.59           | 0.71            | 0.80               |
| Volume                                                | 0.66                                 | 0.57           | 0.58           | 0.68            | 0.75               |
| Model composition                                     |                                      |                |                |                 |                    |
| Non-hydrogen atoms                                    | 36075                                | 36075          | 36075          | 16908           | 19830              |
| Protein residues                                      | 4618                                 | 4618           | 4618           | 2195            | 2361               |
| Waters                                                | 0                                    | 0              | 0              | 0               | 1170               |
| Ligands                                               | 11                                   | 11             | 11             | 0               | 11                 |
| B-factors mean (Å <sup>2</sup> )                      |                                      |                |                |                 |                    |
| Protein                                               | 48                                   | 72             | 50             | 84              | 31                 |
| Ligand                                                | 32                                   | 50             | 37             | -               | 29                 |
| Waters                                                | -                                    | -              | -              | -               | 21                 |
| R.M.S. deviations                                     |                                      |                |                |                 |                    |
| Bond lengths (Å)                                      | 0.005                                | 0.004          | 0.004          | 0.006           | 0.006              |
| Bond angles (°)                                       | 0.840                                | 0.814          | 0.805          | 0.950           | 0.938              |
| Validation                                            |                                      |                |                |                 |                    |
| MolProbity score                                      | 1.00                                 | 0.98           | 0.98           | 1.33            | 0.92               |
| Clashscore                                            | 1.20                                 | 1.19           | 1.19           | 2.41            | 1.36               |
| Poor rotamers (%)                                     | 0.96                                 | 0.93           | 0.93           | 0.97            | 1.02               |
| C-beta outliers (%)                                   | 0                                    | 0              | 0              | 0               | 0                  |
| CaBLAM outliers (%)                                   | 2.05                                 | 1.96           | 2.05           | 2.05            | 1.60               |
| Ramachandran plot (%)                                 |                                      |                |                |                 |                    |
| Favored                                               | 97.11                                | 97.18          | 97.18          | 95.54           | 97.81              |
| Allowed                                               | 2.89                                 | 2.82           | 2.82           | 4.46            | 2.19               |
| Outliers                                              | 0.00                                 | 0.00           | 0.00           | 0.00            | 0.00               |

1127

1128 **Table 2** Residues built in the models  
1129

| Subunit | Total number of residues     | Built residues          |                         | Co-factors                       | Fragments build in entire complex only |
|---------|------------------------------|-------------------------|-------------------------|----------------------------------|----------------------------------------|
|         |                              | Entire complex          | Membrane arm            |                                  |                                        |
| NuoF    | 445                          | 1-441                   |                         | 1-441                            | FMN, N3                                |
| NuoE    | 166                          | 11-166                  |                         | 11-166                           | N1a                                    |
| NuoG    | 908                          | 1-907                   |                         | 1-907                            | N1b, N4, N7                            |
| NuoI    | 180                          | 23-180                  |                         | 39-180                           | N6a, N6b                               |
| NuoB    | 220                          | 43-76, 86-179, 190-220  |                         | 53-71, 90-179, 190-220           | N2                                     |
| NuoCD   | 596:<br>C 1-172<br>D 212-596 | 9-596                   |                         | 9-205, 210-218, 224-233, 238-596 | -                                      |
| NuoH    | 325                          | 52-321                  | 52-214, 223-321         |                                  | -                                      |
| NuoA    | 147                          | 15-38, 60-127           | 15-38, 66-127           |                                  | -                                      |
| NuoJ    | 184                          | 1-164                   | 1-164                   |                                  | -                                      |
| NuoK    | 100                          | 1-100                   | 1-100                   |                                  | -                                      |
| NuoN    | 485                          | 1-191, 199-437, 447-483 | 1-191, 199-437, 447-483 |                                  | -                                      |
| NuoM    | 509                          | 1-504                   | 1-504                   |                                  | -                                      |
| NuoL    | 613                          | 1-612                   | 1-612                   |                                  | -                                      |

1130  
1131

1132 **Table 3** Properties of *E. coli* peripheral arm extensions (analyzed in PIZA)

1133

| Subunit | Extension residues numbers | Interacts with subunit               | Interaction surface, [Å <sup>2</sup> ] | Secondary structure | Specific interactions                                         | Spatial overlap with subunits in other species                                                                   |
|---------|----------------------------|--------------------------------------|----------------------------------------|---------------------|---------------------------------------------------------------|------------------------------------------------------------------------------------------------------------------|
| NuoF    | C-term<br>424-445          | NuoI,<br>NuoD<br>NuoB                | 254<br>557<br>118                      | no                  | Nb 8 Sb 0<br>Hb 0 Sb 1<br>Hb 0 Sb 0                           | Nqo15 <i>T. Therophilus</i><br>NUIM,NUZM, <b>NUMM</b> *,<br><i>Y.Lipolytica</i><br><b>Ndufs6</b> , Ndufs8, mouse |
| NuoG    | Insertion<br>687-781       | NuoCD<br>NuoI                        | 1080<br>585                            | 2 helical<br>turns  | Hb 12 Sb 5<br>Hb 13 Sb 4                                      | Nqo5 <i>T. Therophilus</i><br>NUGM, NUYM<br><i>Y.Lipolytica</i><br>Ndufs3, Ndufs4 mouse                          |
| NuoI    | C-term<br>139-180          | NuoG<br>NuoB<br>NuoF<br>NuoD<br>NuoE | 805<br>348<br>292<br>122<br>421        | 1 helical<br>turn   | Nb 8 Sb 5<br>Nb 1 Sb 0<br>Nb 3 Sb 0<br>Nb 0 Sb 1<br>Nb 1 Sb 0 | Nqo15 <i>T. Therophilus</i><br><b>NUMM</b> <i>Y.Lipolytica</i><br><b>Ndufs6 mouse</b>                            |
| NuoB    | C-term<br>196-220          | NuoI<br>NuoD<br>NuoF                 | 1095<br>216<br>117                     | 2 helical<br>turns  | Nb 16 Sb 4<br>Nb 1 Sb 3<br>Ng 0 Sb 0                          | NUIM, N7BM <i>Y.Lipolytica</i><br>Ndufs8, Ndufa12 mouse                                                          |

\*Subunits in bold are equivalent to NuoI

1134

1135

1136

1137

1138

1139 **Table 4** Comparison of hydrogen bond networks surrounding the N1a cluster in complex I  
 1140 structures solved at high resolution

| Cluster       | Hb acceptor             | Hb donor                   |                                   |                                |
|---------------|-------------------------|----------------------------|-----------------------------------|--------------------------------|
|               |                         | <i>E. coli</i> this work   | <i>A. aeolicus</i><br>[pdb: 6hla] | <i>O. aries</i><br>[pdb: 6zk9] |
| N1a           | N1a S1                  | NH Asn136 3.5Å             | NH Ala130 3.6Å                    | NH Ala147 3.3Å                 |
|               |                         | NH Leu134 3.1Å             | NH Leu128 3.5Å                    | NH Leu145 3.3Å                 |
|               |                         | NδH Asn142 3.6Å            |                                   |                                |
|               | N1a S2                  | NH Cys87 4.0Å              | NH Cys91 3.5Å                     | NH Cys108 3.7Å                 |
|               |                         |                            |                                   | OγH Thr105 2.4Å                |
|               | Sγ, Cys92 (86,103)*     | NH Ser94 3.5Å              | NH Ser88 3.5Å                     | NH Thr 105 3.7Å                |
|               | Sγ, Cys97 (91,108)      | Nδ2H Asn142 4.1Å           | NH Val136 3.4Å                    | NH Met153 4.3Å                 |
|               |                         | NH Asn 142 3.7Å            |                                   |                                |
|               | Sγ, Cys133<br>(127,144) | OH W74 3.2Å                |                                   |                                |
|               |                         | OH W127 3.3Å               | OH W794 3.2Å                      | OH W649 3.2Å                   |
|               | Sγ, Cys137<br>(131,148) | NH Gly97 <sup>F</sup> 4.0Å | N GLy99 <sup>F</sup> 3.7Å         | NH GLy103 <sup>F</sup><br>4.5Å |
|               |                         | NH Gly135 3.3Å             | N Gly129 3.5Å                     | NH Gly146 3.3Å                 |
| N GLy97F 3.4Å |                         | N Gly99F 3.3Å              | N Gly103 3.2Å                     |                                |

\*Numbering in parenthesis is given for *A. aeolicus* and *O. aries*, respectively

1142  
 1143  
 1144



1145 **Table 5** Differences in the hydrogen bond network of iron-sulfur clusters in complex I  
 1146 structures solved at high resolution and water molecules in the immediate cluster environment.  
 1147 (Only the clusters for which such comparison could have been done and clusters displaying  
 1148 differences in the environment are listed)

| Cluster, Subunit | Organism                                                 |                                     |                                                                        |
|------------------|----------------------------------------------------------|-------------------------------------|------------------------------------------------------------------------|
|                  | <i>E. coli</i><br>this work                              | <i>A. aeolicus</i><br>[pdb: 6hla]   | <i>O. aries</i><br>[pdb: 6zk9]                                         |
| N3, NuoF         | His400 (+)<br>Trp363(-)<br>Asn196(+)                     | Leu395(-)<br>Glu349(+)<br>His198(-) | Leu407(-)<br>Gln361(+)<br>Lys202(-)                                    |
| N1b, NuoG        | HOH386                                                   |                                     | HOH1070                                                                |
| N7, NuoG         | HOH441<br>HOH577<br>Cys228<br>Cys231<br>Cys235<br>Cys263 |                                     | Asp229<br>Asp232<br>Ser236<br>Ser264<br>HOH929*<br>HOH933*<br>HOH1005* |
| N4, NuoG         | Thr203(+)                                                |                                     | Val205(-)                                                              |
| N5, NuoG         | conserved                                                |                                     |                                                                        |
| N6a, NuoI        | Phe92(-)                                                 |                                     | Tyr109(+)<br>HOH539                                                    |
| N6b, NuoI        | Leu48(-)<br>Cys74(+)<br>Leu116(-)                        |                                     | His65(+)<br>Ala91(-)<br>Glu133(+)                                      |
| N2, NuoB         | HOH438<br>HOH211<br>Arg250 <sup>D</sup><br>Ser62         |                                     | HOH353<br>HOH579<br>Arg85<br>dimethylated<br>Ala53                     |

1174  
 1175 \* Water molecules replacing the N7 cluster  
 1176  
 1177  
 1178  
 1179  
 1180  
 1181  
 1182  
 1183  
 1184  
 1185  
 1186  
 1187  
 1188  
 1189  
 1190  
 1191  
 1192  
 1193

1194 **Table 6** Histidine residues with unassigned features extending from the imidazole ring  
1195

| Residue              | Modelled atom | Comments                           |
|----------------------|---------------|------------------------------------|
| <sup>E</sup> His87   | None          | Interaction with <sup>E</sup> D146 |
| <sup>E</sup> His150  | HOH           | Distance 2.1 Å                     |
| <sup>E</sup> His152  | HOH           | Distance 2.4-2.6 Å                 |
| <sup>G</sup> His5    | HOH           | Density on both sides              |
| <sup>G</sup> His101  | HOH           | Positive environment               |
| <sup>G</sup> His123  | HOH           | Distance 2.2Å                      |
| <sup>G</sup> His427  | HOH           | Distance 2.85 Å                    |
| <sup>G</sup> His653  | HOH           | Distance 2.5 Å very strong         |
| <sup>CD</sup> His163 | HOH           | Distance 2.5 Å                     |
| <sup>CD</sup> His507 | HOH           | Distance 4.2 Å                     |

1196

1197
